# Supplementary material for: Species Diversity Distribution Patterns of Chinese Endemic Seed Plants Based on Geographical Regions
Source: PLoS One. 2017 Jan 23;12(1):e0170276. doi: 10.1371/journal.pone.0170276 (PMC5256866; doi:10.1371/journal.pone.0170276)
Supplement: S1 Appendix — (XLSX) [file pone.0170276.s002.xlsx]

## Sheet: Sheet1
Code	genus	species	subspecies	Growth form	Geo1	Geo2	Geo3	Geo4	Geo5	Geo6	Geo7	AreaⅠ	Area Ⅱ	Area Ⅲ
1	Podocarpus	forrestii		S	0	0	1	0	0	0	0	1	0	0
2	Podocarpus	macrophyllus	var.chingii	T	0	1	1	0	0	0	1	1	0	1
3	Podocarpus	macrophyllus	var.piliramulus	T	0	0	1	0	0	0	0	1	0	0
4	Podocarpus	nakaii		T	0	0	1	0	0	0	0	1	0	0
5	Podocarpus	wangii		T	0	0	0	1	0	0	0	1	0	0
6	Cephalotaxus	fortunei	var.alpina	T	0	1	1	1	0	1	0	1	1	0
7	Cephalotaxus	latifolia		S	0	0	1	1	0	0	1	1	0	1
8	Cephalotaxus	oliveri		S	0	0	1	0	0	0	0	1	0	0
9	Cephalotaxus	sinensis	var.wilsoniana	T	0	0	1	0	0	0	0	1	0	0
10	Cephalotaxus	sinensis		S	0	0	1	0	0	1	0	1	1	0
11	Abies	beshanzuensis	var.ziyuanensis	T	0	0	1	1	0	0	0	1	0	0
12	Abies	beshanzuensis		T	0	0	1	1	0	0	0	1	0	0
13	Abies	chayuensis		T	0	0	0	0	0	0	1	0	0	1
14	Abies	chensiensis		T	0	0	1	0	0	1	1	1	1	1
15	Abies	delavayi	var.motuoensis	T	0	0	0	0	0	0	1	0	0	1
16	Abies	ernestii	var.salouenensis	T	0	0	1	1	0	0	1	1	0	1
17	Abies	ernestii		T	0	1	1	1	0	1	1	1	1	1
18	Abies	fabri		T	0	0	1	0	0	0	0	1	0	0
19	Abies	fanjingshanensis		T	0	0	1	0	0	0	0	1	0	0
20	Abies	fargesii	var.faxoniana	T	0	1	1	0	0	1	1	1	1	1
21	Abies	fargesii		T	0	0	1	0	0	1	1	1	1	1
22	Abies	ferreana	var.longibracteata	T	0	0	1	0	0	0	0	1	0	0
23	Abies	ferreana		T	0	0	1	1	0	0	0	1	0	0
24	Abies	forrestii		T	0	0	1	1	0	0	1	1	0	1
25	Abies	georgei	var.smithii	T	0	0	1	1	0	0	1	1	0	1
26	Abies	georgei		T	0	0	1	1	0	0	1	1	0	1
27	Abies	kawakamii		T	0	0	1	0	0	0	0	1	0	0
28	Abies	recurvata		T	0	1	1	0	0	1	1	1	1	1
29	Abies	squamata		T	0	1	0	0	0	1	1	1	1	1
30	Abies	yuanbaoshanensis		T	0	0	1	0	0	0	0	1	0	0
31	Cathaya	argyrophylla		T	0	1	1	1	0	0	1	1	0	1
32	Keteleeria	davidiana	var.calcarea	T	0	0	1	1	0	0	0	1	0	0
33	Keteleeria	davidiana	var.formosana	T	0	0	1	0	0	0	0	1	0	0
34	Keteleeria	davidiana		T	0	0	1	1	0	1	0	1	1	0
35	Keteleeria	fortunei	var.cyclolepis	T	0	0	1	0	0	0	0	1	0	0
36	Keteleeria	fortunei	var.oblonga	T	0	0	1	0	0	0	0	1	0	0
37	Keteleeria	hainanensis		T	0	0	0	1	0	0	0	1	0	0
38	Keteleeria	pubescens		T	0	0	1	1	0	0	0	1	0	0
39	Larix	gmelinii	var.principis-rupprechtii	T	0	1	0	0	0	0	0	1	0	0
40	Larix	kongboensis		T	0	0	0	0	0	0	1	0	0	1
41	Larix	mastersiana		T	0	0	1	0	0	0	0	1	0	0
42	Larix	potaninii	var.australis	T	0	0	1	1	0	0	1	1	0	1
43	Larix	potaninii	var.chinensis	T	0	0	1	0	0	0	0	1	0	0
44	Larix	potaninii		T	0	1	1	1	0	1	1	1	1	1
45	Larix	speciosa		T	0	0	1	1	0	0	1	1	0	1
46	Picea	asperata	var.aurantiaca	T	0	0	1	0	0	0	1	1	0	1
47	Picea	asperata	var.heterplepis	T	0	0	0	0	0	0	1	0	0	1
48	Picea	asperata		T	0	1	0	0	0	1	1	1	1	1
49	Picea	crassifolia		T	1	0	1	0	1	1	1	1	1	1
50	Picea	koraiensis	var.nenjiangensis	T	1	0	0	0	0	0	0	1	0	0
51	Picea	likiangensis	var.montigena	T	0	0	0	0	0	0	1	0	0	1
52	Picea	likiangensis	var.linzhiensis	T	0	0	1	1	0	0	1	1	0	1
53	Picea	likiangensis	var.hirtella	T	0	0	1	0	0	0	1	1	0	1
54	Picea	likiangensis	var.rebescens	T	0	0	0	0	0	0	1	0	0	1
55	Picea	meyeri		T	1	1	0	0	1	1	1	1	1	1
56	Picea	morrisonicola		T	0	0	1	0	0	0	0	1	0	0
57	Picea	neoveitchii		T	0	1	1	0	0	1	1	1	1	1
58	Picea	purpurea		T	0	1	1	0	0	1	1	1	1	1
59	Picea	wilsonii		T	1	1	1	0	1	1	1	1	1	1
60	Pinus	armandii	var.mastersiana	T	0	0	1	0	0	0	0	1	0	0
61	Pinus	bungeana		T	0	1	1	0	0	1	1	1	1	1
62	Pinus	densata		T	0	0	1	1	0	0	1	1	0	1
63	Pinus	densiflora	var.zhangwuensis	T	1	0	0	0	0	0	0	1	0	0
64	Pinus	fenzeliana	var.dabeshanesis	T	0	0	1	0	0	0	0	1	0	0
65	Pinus	fragilissima		T	0	0	1	0	0	0	0	1	0	0
66	Pinus	hwangshanensis	ssp.transfluminea	T	0	0	1	0	0	0	0	1	0	0
67	Pinus	luchuensis	var.shenkanensis	T	0	0	1	0	0	0	0	1	0	0
68	Pinus	massoniana	var.hainanensis	T	0	0	0	1	0	0	0	1	0	0
69	Pinus	massoniana	var.shaxianensis	T	0	0	1	0	0	0	0	1	0	0
70	Pinus	massoniana		T	0	0	1	1	0	0	0	1	0	0
71	Pinus	morrisonicola		T	0	0	1	0	0	0	0	1	0	0
72	Pinus	squamata		T	0	0	1	0	0	0	0	1	0	0
73	Pinus	sylvestris	var.sylvestriformis	T	1	0	0	0	0	0	0	1	0	0
74	Pinus	tabuliformis	var.umbraculifera	T	0	1	0	0	0	0	0	1	0	0
75	Pinus	tabuliformis	var.henryi	T	0	0	1	0	0	0	1	1	0	1
76	Pinus	taiwanensis		T	0	0	1	1	0	0	0	1	0	0
77	Pinus	×cerambycifera		T	0	0	1	1	0	0	1	1	0	1
78	Pinus	yunnanensis	var.tenuifolia	T	0	0	1	1	0	0	0	1	0	0
79	Pinus	yunnanensis	var.pygmaea	S	0	0	1	1	0	0	0	1	0	0
80	Pinus	yunnanensis		T	0	0	1	1	0	0	1	1	0	1
81	Pseudolarix	amabilis		T	0	0	1	0	0	0	0	1	0	0
82	Pseudotsuga	brevifolia		T	0	0	1	1	0	0	0	1	0	0
83	Pseudotsuga	forrestii		T	0	0	1	0	0	0	0	1	0	0
84	Pseudotsuga	sinensis	var.wilsoniana	T	0	0	1	0	0	0	0	1	0	0
85	Pseudotsuga	sinensis		T	0	0	1	0	0	0	0	1	0	0
86	Tsuga	chinensis	var.robusta	T	0	0	1	0	0	0	1	1	0	1
87	Tsuga	chinensis	var.forrestii	T	0	0	1	1	0	0	0	1	0	0
88	Calamus	rhabdocladus		V	0	0	1	1	0	0	0	1	0	0
89	Cycas	changjiangensis		T	0	0	0	1	0	0	0	1	0	0
90	Cycas	debaoebsis		T	0	0	1	0	0	0	0	1	0	0
91	Cycas	hainanensis		T	0	0	0	1	0	0	0	1	0	0
92	Cycas	hongheensis		T	0	0	0	1	0	0	0	1	0	0
93	Cycas	panzhihuaensis		T	0	0	1	1	0	0	0	1	0	0
94	Cycas	segmentifida		T	0	0	1	1	0	0	0	1	0	0
95	Cycas	taitungensis		T	0	0	1	0	0	0	0	1	0	0
96	Ginkgo	biloba		T	0	0	1	0	0	0	0	1	0	0
97	Amentotaxus	argotaenia	var.brevifolia	S	0	0	1	0	0	0	0	1	0	0
98	Amentotaxus	formosana		T	0	0	1	0	0	0	0	1	0	0
99	Pseudotaxus	chienii		T	0	0	1	1	0	0	0	1	0	0
100	Torreya	fargesii	var.yunnanensis	T	0	0	1	0	0	0	0	1	0	0
101	Torreya	fargesii		T	0	0	1	1	0	0	0	1	0	0
102	Torreya	grandis	var.jiulongshanensis	T	0	0	1	0	0	0	0	1	0	0
103	Torreya	grandis		T	0	0	1	0	0	0	0	1	0	0
104	Torreya	jackii		T	0	0	1	0	0	0	0	1	0	0
105	Juniperus	chengii		T	0	0	1	0	0	0	0	1	0	0
106	Juniperus	convallium	var.microsperma	T	0	0	0	0	0	0	1	0	0	1
107	Juniperus	convallium		T	0	0	0	0	0	0	1	0	0	1
108	Juniperus	formosana		S	0	0	1	0	0	1	1	1	1	1
109	Juniperus	gaussenii		S	0	0	1	0	0	0	0	1	0	0
110	Juniperus	komarovii		T	0	0	1	0	0	0	1	1	0	1
111	Juniperus	pingii	var.wilsonii	S	0	1	1	1	0	1	1	1	1	1
112	Juniperus	pingii	var.carinata	S	0	1	1	1	0	1	1	1	1	1
113	Juniperus	pingii		T	0	1	1	1	0	1	1	1	1	1
114	Juniperus	przewalskii		T	0	1	1	0	0	1	1	1	1	1
115	Juniperus	sabina	var.erectopatens	T	0	0	0	0	0	0	1	0	0	1
116	Juniperus	sabina	var.yulinensis	S	0	1	0	0	0	0	0	1	0	0
117	Juniperus	saltuaria		T	0	1	1	1	0	1	1	1	1	1
118	Juniperus	squamata	var.fargesii	S	0	1	1	1	0	1	0	1	1	0
119	Juniperus	squamata	var.hongxiensis	S	0	0	1	0	0	0	0	1	0	0
120	Juniperus	squamata	var.parviflora	S	0	0	0	0	0	0	1	0	0	1
121	Tsuga	chinensis	var.formosana	T	0	0	1	0	0	0	0	1	0	0
122	Tsuga	chinensis	var.patens	T	0	0	1	0	0	0	0	1	0	0
123	Tsuga	chinensis		T	0	0	1	0	0	1	1	1	1	1
124	Tsuga	longibracteata		T	0	0	1	0	0	0	0	1	0	0
125	Tsuga	oblongisquamata		T	0	1	1	0	0	1	1	1	1	1
126	Cryptomeria	japonica	var.sinensis	T	0	0	1	1	0	0	0	1	0	0
127	Metasequoia	glyptostroboides		T	0	0	1	0	0	0	1	1	0	1
128	Calocedrus	macrolepis	var.formosana	T	0	0	1	0	0	0	0	1	0	0
129	Chamaecyparis	formosensis		T	0	0	1	0	0	0	0	1	0	0
130	Chamaecyparis	obtusa	var.formosana	T	0	0	1	0	0	0	0	1	0	0
131	Cupressus	chengiana	var.jiangeensis	T	0	0	1	0	0	0	0	1	0	0
132	Cupressus	chengiana		T	0	1	1	0	0	1	1	1	1	1
133	Cupressus	duclouxiana		T	0	0	1	1	0	0	1	1	0	1
134	Cupressus	funebris		T	0	0	1	0	0	1	0	1	1	0
135	Cupressus	gigantea		T	0	0	0	0	0	0	1	0	0	1
136	Juniperus	baimashanensis		S	0	0	1	0	0	0	0	1	0	0
137	Juniperus	tibetica		T	0	1	0	0	0	1	1	1	1	1
138	Thuja	sutchuenensis		S	0	0	1	0	0	0	0	1	0	0
139	Ephedra	equisetina	var.monoica	S	0	1	0	0	0	0	0	1	0	0
140	Ephedra	likiangensis		S	0	0	1	1	0	0	1	1	0	1
141	Ephedra	minuta		S	0	0	1	0	0	0	1	1	0	1
142	Ephedra	rituensis		S	0	0	0	0	0	0	1	0	0	1
143	Gnetum	catasphaericum		WV	0	0	0	1	0	0	0	1	0	0
144	Gnetum	giganteum		WV	0	0	1	1	0	0	0	1	0	0
145	Gnetum	gracilipes		WV	0	0	0	1	0	0	0	1	0	0
146	Gnetum	luofuense		V	0	0	1	1	0	0	0	1	0	0
147	Gnetum	pendulum		V	0	0	1	1	0	0	1	1	0	1
148	Gymnotheca	involucrata		H	0	0	1	0	0	0	0	1	0	0
149	Peperomia	cavaleriei		H	0	0	1	1	0	0	0	1	0	0
150	Peperomia	nakaharai		P	0	0	1	0	0	0	0	1	0	0
151	Piper	austrosinense		WV	0	0	0	1	0	0	0	1	0	0
152	Piper	bambusaefolium		HV	0	0	1	0	0	0	1	1	0	1
153	Piper	boehmeriifolium	var.glabricaule	S	0	0	0	1	0	0	0	1	0	0
154	Piper	bonii	var.macrophyllum	HV	0	0	1	1	0	0	0	1	0	0
155	Piper	cathayanum		HV	0	0	1	1	0	0	1	1	0	1
156	Piper	chinense		WV	0	0	1	1	0	0	0	1	0	0
157	Piper	damiaoshanense		HV	0	0	1	0	0	0	0	1	0	0
158	Piper	dolichostachyum		H	0	0	1	0	0	0	0	1	0	0
159	Piper	flaviflorum		HV	0	0	1	1	0	0	0	1	0	0
160	Piper	hainanense		WV	0	0	0	1	0	0	0	1	0	0
161	Piper	hancei		HV	0	0	1	1	0	0	0	1	0	0
162	Piper	hochiense		HV	0	0	1	0	0	0	0	1	0	0
163	Piper	hongkongense		HV	0	0	0	1	0	0	0	1	0	0
164	Piper	infossibaccatum		HV	0	0	0	1	0	0	0	1	0	0
165	Piper	infossum	var.nudum	HV	0	0	0	0	0	0	1	0	0	1
166	Piper	infossum		HV	0	0	0	0	0	0	1	0	0	1
167	Piper	kwashoense		HV	0	0	1	0	0	0	0	1	0	0
168	Piper	laetispicum		WV	0	0	0	1	0	0	0	1	0	0
169	Piper	lingshuiense		WV	0	0	0	1	0	0	0	1	0	0
170	Piper	macropodum		HV	0	0	1	1	0	0	0	1	0	0
171	Piper	mischocarpum		HV	0	0	0	1	0	0	0	1	0	0
172	Piper	nudibaccatum		HV	0	0	0	1	0	0	0	1	0	0
173	Piper	pingbienense		HV	0	0	0	1	0	0	0	1	0	0
174	Piper	pleiocarpum		WV	0	0	0	1	0	0	0	1	0	0
175	Piper	puberulilimbum		HV	0	0	0	1	0	0	0	1	0	0
176	Piper	senporeiense		WV	0	0	0	1	0	0	0	1	0	0
177	Piper	sintenense		HV	0	0	1	0	0	0	0	1	0	0
178	Piper	stipitiforme		WV	0	0	0	1	0	0	0	1	0	0
179	Piper	submultinerve	var.nandanicum	HV	0	0	1	0	0	0	0	1	0	0
180	Piper	submultinerve		HV	0	0	1	1	0	0	0	1	0	0
181	Piper	taiwanense		HV	0	0	1	0	0	0	0	1	0	0
182	Piper	thomsonii	var.microphyllum	HV	0	0	0	1	0	0	0	1	0	0
183	Piper	tricolor		HV	0	0	1	1	0	0	0	1	0	0
184	Piper	tsangyuanense		HV	0	0	1	1	0	0	0	1	0	0
185	Piper	tsengianum		S	0	0	1	1	0	0	0	1	0	0
186	Piper	wangii		HV	0	0	0	1	0	0	0	1	0	0
187	Piper	yinkiangense		HV	0	0	1	0	0	0	0	1	0	0
188	Piper	yui		WV	0	0	1	1	0	0	0	1	0	0
189	Piper	yunnanense		S	0	0	0	1	0	0	0	1	0	0
190	Chloranthus	angustifolius		P	0	0	1	0	0	0	1	1	0	1
191	Chloranthus	anhuiensis		P	0	1	1	0	0	0	0	1	0	0
192	Chloranthus	fortunei		P	0	1	1	1	0	0	0	1	0	0
193	Chloranthus	henryi	var.hupehensis	P	0	1	1	0	0	1	1	1	1	1
194	Chloranthus	henryi		P	0	0	1	1	0	1	1	1	1	1
195	Chloranthus	holostegius	var.shimianensis	P	0	0	1	0	0	0	1	1	0	1
196	Chloranthus	holostegius	var.trichoneurus	P	0	0	1	1	0	0	0	1	0	0
197	Chloranthus	holostegius		P	0	0	1	1	0	0	0	1	0	0
198	Chloranthus	multistachys		P	0	0	1	1	0	1	1	1	1	1
199	Chloranthus	oldhamii		P	0	0	1	0	0	0	0	1	0	0
200	Chloranthus	serratus	var.taiwanensis	P	0	0	1	0	0	0	0	1	0	0
201	Chloranthus	sessilifolius	var.austro-sinensis	P	0	0	1	1	0	0	0	1	0	0
202	Chloranthus	sessilifolius		P	0	0	1	1	0	0	1	1	0	1
203	Chloranthus	tianmushanensis		P	0	0	1	0	0	0	0	1	0	0
204	Populus	adenopoda	var.platyphylla	T	0	0	1	1	0	0	0	1	0	0
205	Populus	adenopoda		T	0	0	1	1	0	0	0	1	0	0
206	Populus	afghanica	var.tadishistanica	T	0	0	0	0	0	1	0	0	1	0
207	Populus	alaschanica		T	0	0	0	0	1	1	0	0	1	0
208	Populus	cathayana	var.pedicellata	T	0	1	0	0	0	0	0	1	0	0
209	Populus	cathayana	var.latifolia	T	0	1	1	0	0	1	1	1	1	1
210	Populus	cathayana		T	1	1	1	0	1	1	1	1	1	1
211	Populus	charbinensis	var.pachydermis	T	1	1	0	0	1	0	0	1	1	0
212	Populus	charbinensis		T	1	1	0	0	1	0	0	1	1	0
213	Populus	ciliata	var.weixi	T	0	0	1	0	0	0	0	1	0	0
214	Populus	ciliata	var.gyirongensis	T	0	0	0	0	0	0	1	0	0	1
215	Populus	ciliata	var.aurea	T	0	0	0	0	0	0	1	0	0	1
216	Populus	girinensis	var.ivaschkevitchii	T	1	0	0	0	0	0	0	1	0	0
217	Populus	girinensis		T	1	0	0	0	0	0	0	1	0	0
218	Populus	haoana	var.megaphylla	T	0	0	0	1	0	0	0	1	0	0
219	Populus	haoana	var.macrocarpa	T	0	0	1	1	0	0	0	1	0	0
220	Populus	haoana	var.microcarpa	T	0	0	1	0	0	0	0	1	0	0
221	Populus	haoana		T	0	0	1	1	0	0	0	1	0	0
222	Populus	hsinganica	var.trichorachis	T	1	0	0	0	1	1	0	1	1	0
223	Populus	hsinganica		T	1	0	0	0	1	1	0	1	1	0
224	Populus	iliensis		T	0	0	0	0	0	1	0	0	1	0
225	Populus	intramongolica		T	1	1	0	0	1	1	0	1	1	0
226	Populus	kangdingensis		T	0	0	0	0	0	0	1	0	0	1
227	Populus	keerqinensis		T	0	0	0	0	1	0	0	0	1	0
228	Populus	lancifolia		T	0	0	0	0	0	0	1	0	0	1
229	Populus	lasiocarpa	var.longiamenta	T	0	0	1	0	0	0	0	1	0	0
230	Populus	lasiocarpa		T	0	0	1	0	0	0	0	1	0	0
231	Populus	mainlingensis		T	0	0	0	0	0	0	1	0	0	1
232	Populus	manshurica		T	0	0	0	0	1	0	0	0	1	0
233	Populus	minhoensis		T	0	0	0	0	0	0	1	0	0	1
234	Populus	ningshanica		T	0	1	1	0	0	0	0	1	0	0
235	Populus	pamirica	var.tibetica	T	0	0	1	0	0	0	1	1	0	1
236	Populus	pilosa	var.leiocarpa	T	0	0	0	0	0	1	0	0	1	0
237	Populus	platyphylla		T	1	1	0	0	1	1	0	1	1	0
238	Populus	przewalskii		T	1	1	1	0	1	1	1	1	1	1
239	Populus	pseudoglauca		T	0	0	1	0	0	0	1	1	0	1
240	Populus	pseudomaximowiczii		T	0	1	1	0	0	0	0	1	0	0
241	Populus	pseudosimonii	var.patula	T	0	0	0	0	1	0	0	0	1	0
242	Populus	pseudosimonii		T	1	1	1	0	1	1	1	1	1	1
243	Populus	purdomii	var.rockii	T	0	1	1	0	0	0	0	1	0	0
244	Populus	purdomii		T	0	0	1	0	1	1	1	1	1	1
245	Populus	qamdoensis		T	0	0	0	0	0	0	1	0	0	1
246	Populus	qiongdaoensis		T	0	0	0	1	0	0	0	1	0	0
247	Populus	rotundifolia	var.duclouxiana	T	0	1	1	1	0	1	1	1	1	1
248	Populus	rotundifolia	var.bonati	T	0	0	1	1	0	0	0	1	0	0
249	Populus	schneideri		T	0	0	1	1	0	0	1	1	0	1
250	Populus	shanxiensis		T	0	1	0	0	0	0	0	1	0	0
251	Populus	simonii	var.rotundifolia	T	0	0	0	0	1	0	0	0	1	0
252	Populus	simonii	var.tsinlingensis	T	0	0	1	0	0	0	0	1	0	0
253	Populus	simonii	var.latifolia	T	1	0	0	0	0	0	0	1	0	0
254	Populus	simonii	var.liaotungensis	T	1	0	0	0	1	1	0	1	1	0
255	Populus	szechuanica	var.tibetica	T	0	0	1	0	0	0	1	1	0	1
256	Populus	szechuanica		T	0	1	1	1	0	1	0	1	1	0
257	Populus	tomentosa	var.truncata	T	0	1	1	0	0	0	0	1	0	0
258	Populus	tomentosa		T	0	1	0	1	0	1	0	1	1	0
259	Populus	trinervis	var.shimianica	T	0	0	1	0	0	0	0	1	0	0
260	Populus	trinervis		T	0	0	1	0	0	0	1	1	0	1
261	Populus	wenxianica		T	0	0	1	0	0	0	0	1	0	0
262	Populus	wilsonii		T	0	0	1	1	0	1	1	1	1	1
263	Populus	wuana		T	0	0	0	0	0	0	1	0	0	1
264	Populus	wulianensis		T	0	1	0	0	0	0	0	1	0	0
265	Populus	xiangchengensis		T	0	0	0	0	0	0	1	0	0	1
266	Populus	yatungensis	var.crenata	T	0	0	0	0	0	0	1	0	0	1
267	Populus	yatungensis		T	0	0	1	1	0	0	1	1	0	1
268	Populus	yuana		T	0	0	1	1	0	0	1	1	0	1
269	Populus	yunnanensis	var.pedicellata	T	0	0	1	1	0	0	0	1	0	0
270	Populus	yunnanensis	var.microphylla	T	0	0	1	1	0	0	0	1	0	0
271	Populus	yunnanensis		T	0	0	1	1	0	0	0	1	0	0
272	Salix	alfredii	var.fengxianica	S	0	0	1	0	0	0	0	1	0	0
273	Salix	alfredii		S	0	1	1	0	0	1	1	1	1	1
274	Salix	amphibola		S	0	0	0	0	0	0	1	0	0	1
275	Salix	annulifera	var.dentata	S	0	0	1	0	0	0	0	1	0	0
276	Salix	annulifera	var.glabra	S	0	0	1	0	0	0	0	1	0	0
277	Salix	annulifera	var.macriula	S	0	0	1	1	0	0	1	1	0	1
278	Salix	annulifera		S	0	0	1	1	0	0	1	1	0	1
279	Salix	argyrophegga		T	0	0	1	0	0	0	1	1	0	1
280	Salix	argyrotrichocarpa		S	0	0	0	0	0	0	1	0	0	1
281	Salix	atopantha	var.pedicellata	S	0	0	0	0	0	0	1	0	0	1
282	Salix	atopantha		S	0	1	0	0	0	1	1	1	1	1
283	Salix	austrotibetica		S	0	0	0	0	0	0	1	0	0	1
284	Salix	babylonica	var.glandulipilosa	T	1	1	1	1	1	1	1	1	1	1
285	Salix	baileyi		T	0	0	1	0	0	0	0	1	0	0
286	Salix	balansaei	var.hunanensis	T	0	0	1	0	0	0	0	1	0	0
287	Salix	balfouriana		S	0	0	1	1	0	0	0	1	0	0
288	Salix	bangongensis		T	0	0	0	0	0	0	1	0	0	1
289	Salix	bikouensis	var.villosa	S	0	0	1	0	0	0	0	1	0	0
290	Salix	bikouensis		S	0	1	1	0	0	1	1	1	1	1
291	Salix	biondiana		S	0	1	1	0	0	1	1	1	1	1
292	Salix	boseensis		S	0	0	1	0	0	0	0	1	0	0
293	Salix	bouffordii		S	0	0	1	1	0	0	0	1	0	0
294	Salix	brachista	var.integra	S	0	0	1	0	0	0	0	1	0	0
295	Salix	brachista	var.pilifera	S	0	0	0	0	0	0	1	0	0	1
296	Salix	brachista		S	0	0	1	1	0	0	1	1	0	1
297	Salix	burqinensis		T	0	0	0	0	0	1	0	0	1	0
298	Salix	calyculata	var.gongshanica	S	0	0	1	0	0	0	0	1	0	0
299	Salix	capitata		T	0	0	0	0	1	1	0	0	1	0
300	Salix	cathayana		S	0	0	1	0	0	0	0	1	0	0
301	Salix	cavaleriei		T	0	0	1	1	0	0	0	1	0	0
302	Salix	chaenomeloides	var.glandulifolia	T	0	1	1	0	0	0	0	1	0	0
303	Salix	characta		S	1	1	0	0	1	1	1	1	1	1
304	Salix	cheilophila	var.acuminata	S	0	1	0	0	0	0	0	1	0	0
305	Salix	cheilophila	var.villosa	S	0	1	0	0	0	0	0	1	0	0
306	Salix	cheilophila		S	1	1	0	1	1	1	1	1	1	1
307	Salix	chekiangensis		T	0	0	1	0	0	0	0	1	0	0
308	Salix	chienii	var.pubigera	S	0	0	1	0	0	0	0	1	0	0
309	Salix	chienii		S	0	0	1	0	0	0	0	1	0	0
310	Salix	chikungensis		S	0	0	1	0	0	0	0	1	0	0
311	Salix	chingiana		T	0	1	1	0	0	1	1	1	1	1
312	Salix	clathrata		S	0	0	1	1	0	0	1	1	0	1
313	Salix	coggygria		S	0	0	1	1	0	0	1	1	0	1
314	Salix	contortiapiculata		S	0	0	1	0	0	0	0	1	0	0
315	Salix	crenata		S	0	0	1	1	0	0	1	1	0	1
316	Salix	cupularis	var.acutifolia	S	0	0	0	0	1	0	0	0	1	0
317	Salix	cupularis		S	1	1	1	0	1	1	1	1	1	1
318	Salix	cyanolimnea		S	0	0	1	1	0	0	1	1	0	1
319	Salix	daguanensis		S	0	0	1	0	0	0	0	1	0	0
320	Salix	daliensis		S	0	0	1	1	0	0	0	1	0	0
321	Salix	dalungensis		T	0	0	0	0	0	0	1	0	0	1
322	Salix	delavayana	var.pilososuturalis	S	0	0	0	0	0	0	1	0	0	1
323	Salix	delavayana		S	0	0	1	1	0	0	1	1	0	1
324	Salix	dibapha	var.biglandulosa	S	0	1	0	0	0	0	0	1	0	0
325	Salix	dibapha		S	0	0	1	1	0	0	1	1	0	1
326	Salix	dissa	var.cereifolia	S	0	0	1	0	0	0	0	1	0	0
327	Salix	dissa		S	0	1	1	1	0	1	0	1	1	0
328	Salix	divergentistyla		S	0	0	0	0	0	0	1	0	0	1
329	Salix	doii		S	0	0	1	0	0	0	0	1	0	0
330	Salix	donggouxianica		S	0	1	0	0	0	0	0	1	0	0
331	Salix	driophila		S	0	0	1	1	0	0	1	1	0	1
332	Salix	dunnii	var.tsoongii	S	0	0	1	0	0	0	0	1	0	0
333	Salix	dunnii		S	0	0	1	1	0	0	0	1	0	0
334	Salix	erioclada		S	0	0	1	0	0	0	1	1	0	1
335	Salix	eriostachya	var.lineariloba	S	0	0	0	0	0	0	1	0	0	1
336	Salix	ernestii		S	0	0	1	1	0	0	1	1	0	1
337	Salix	etosia		S	0	0	1	0	0	0	1	1	0	1
338	Salix	fargesii	var.kansuensis	T	0	0	1	0	0	1	1	1	1	1
339	Salix	fargesii		T	0	0	1	0	0	1	1	1	1	1
340	Salix	faxonianoides	var.vilosa	S	0	0	1	1	0	0	1	1	0	1
341	Salix	faxonianoides		S	0	0	1	1	0	0	1	1	0	1
342	Salix	fengiana	var.gymnocarpa	S	0	0	1	0	0	0	0	1	0	0
343	Salix	fengiana		S	0	0	1	0	0	0	0	1	0	0
344	Salix	floccosa		S	0	0	1	1	0	0	1	1	0	1
345	Salix	fulvopubescens		S	0	0	1	0	0	0	0	1	0	0
346	Salix	gilashanica		S	0	0	1	1	0	0	1	1	0	1
347	Salix	glareorum		S	0	0	1	0	0	0	0	1	0	0
348	Salix	gonggashanica		S	0	0	1	0	0	0	1	1	0	1
349	Salix	gracilior		S	1	0	0	0	1	1	0	1	1	0
350	Salix	guebriantiana		S	0	0	1	1	0	0	0	1	0	0
351	Salix	gyamdaensis		S	0	0	0	0	0	0	1	0	0	1
352	Salix	gyirongensis		S	0	0	1	0	0	0	1	1	0	1
353	Salix	hainanica		S	0	0	0	1	0	0	0	1	0	0
354	Salix	haoana		S	0	0	1	0	0	0	1	1	0	1
355	Salix	heishuiensis		S	0	0	0	0	0	0	1	0	0	1
356	Salix	heterochroma	var.glabra	S	0	0	1	0	0	0	0	1	0	0
357	Salix	heterochroma		S	0	0	1	1	0	1	0	1	1	0
358	Salix	heteromera		T	0	0	1	1	0	0	0	1	0	0
359	Salix	hirticaulis		S	0	0	1	0	0	0	0	1	0	0
360	Salix	hsinganica		S	1	0	0	0	1	1	0	1	1	0
361	Salix	humaensis		S	1	0	0	0	0	0	0	1	0	0
362	Salix	hupehensis		S	0	0	1	0	0	0	0	1	0	0
363	Salix	hylonoma	var.liocarpa	T	0	0	1	0	0	0	0	1	0	0
364	Salix	hylonoma		T	0	1	1	1	1	1	0	1	1	0
365	Salix	hypoleuca	var.platyphylla	S	0	1	1	0	0	0	1	1	0	1
366	Salix	hypoleuca		S	0	0	1	0	0	1	1	1	1	1
367	Salix	inamoena		S	0	0	1	1	0	0	0	1	0	0
368	Salix	jinchuanica		S	0	0	0	0	0	0	1	0	0	1
369	Salix	jingdongensis		S	0	0	1	0	0	0	0	1	0	0
370	Salix	jishiensis		T	0	1	0	0	0	0	1	1	0	1
371	Salix	juparica	var.tibetica	S	0	0	0	0	0	0	1	0	0	1
372	Salix	juparica		S	0	0	0	0	0	0	1	0	0	1
373	Salix	kamanica		S	0	0	1	1	0	0	1	1	0	1
374	Salix	kangdingensis		S	0	0	0	0	0	0	1	0	0	1
375	Salix	kangensis	var.leiocarpa	T	1	1	0	0	1	0	0	1	1	0
376	Salix	kirilowiana		S	0	0	0	0	0	1	0	0	1	0
377	Salix	kongbanica		T	0	0	0	0	0	0	1	0	0	1
378	Salix	koreensis	var.brevistyla	T	1	1	0	0	1	0	0	1	1	0
379	Salix	koreensis	var.pedunculata	T	0	1	1	0	0	0	0	1	0	0
380	Salix	koreensis	var.shandongensis	T	0	1	0	0	0	0	0	1	0	0
381	Salix	kouytchensis		S	0	0	1	1	0	0	0	1	0	0
382	Salix	kungmuensis		S	0	0	1	0	0	0	0	1	0	0
383	Salix	kusanoi		T	0	0	1	0	0	0	0	1	0	0
384	Salix	lamashanensis		S	0	1	1	0	0	1	1	1	1	1
385	Salix	lanifera		S	0	0	0	0	0	0	1	0	0	1
386	Salix	lasiopes		S	0	0	0	0	0	0	1	0	0	1
387	Salix	leveilleana		S	0	0	1	0	0	0	0	1	0	0
388	Salix	limprichtii		S	0	0	1	0	0	0	0	1	0	0
389	Salix	linearistipularis		S	0	1	0	0	1	1	1	1	1	1
390	Salix	liouana		S	0	1	1	0	0	0	0	1	0	0
391	Salix	longiflora	var.albescens	S	0	0	0	0	0	0	1	0	0	1
392	Salix	longissimipedicellaris		S	0	0	1	1	0	0	0	1	0	0
393	Salix	longistamina	var.glabra	T	0	0	0	0	0	0	1	0	0	1
394	Salix	longistamina		T	0	0	0	0	0	0	1	0	0	1
395	Salix	luctuosa		S	0	1	1	1	0	0	1	1	0	1
396	Salix	ludingensis		S	0	0	0	0	0	0	1	0	0	1
397	Salix	macroblasta		S	0	1	1	0	0	1	1	1	1	1
398	Salix	maerkangensis		S	0	0	0	0	0	0	1	0	0	1
399	Salix	magnifica	var.ulotricha	S	0	0	0	0	0	0	1	0	0	1
400	Salix	magnifica	var.apetala	S	0	0	1	0	0	0	1	1	0	1
401	Salix	magnifica		S	0	0	1	0	0	0	1	1	0	1
402	Salix	maizhokunggarensis		S	0	0	0	0	0	0	1	0	0	1
403	Salix	matsudana	var.pseudo-matsudana	T	0	1	0	0	0	0	0	1	0	0
404	Salix	matsudana	var.anshanensis	T	0	1	0	0	0	0	0	1	0	0
405	Salix	matsudana		T	1	1	0	0	1	1	1	1	1	1
406	Salix	medogensis		T	0	0	0	0	0	0	1	0	0	1
407	Salix	mesnyi		T	0	0	1	1	0	0	0	1	0	0
408	Salix	metaglauca		S	0	0	0	0	0	1	0	0	1	0
409	Salix	microphyta		S	0	0	1	1	0	0	0	1	0	0
410	Salix	microstachya	var.bordensis	S	1	0	0	0	1	1	0	1	1	0
411	Salix	mictotricha		S	0	0	1	0	0	0	1	1	0	1
412	Salix	minjiangensis		S	0	0	0	0	0	0	1	0	0	1
413	Salix	morrisonicola		S	0	0	1	0	0	0	0	1	0	0
414	Salix	moupinensis		T	0	0	1	1	0	0	0	1	0	0
415	Salix	muliensis		S	0	0	1	1	0	0	0	1	0	0
416	Salix	nankingensis		S	0	0	1	0	0	0	0	1	0	0
417	Salix	neoamnematchinensis		S	0	0	0	0	0	0	1	0	0	1
418	Salix	neolapponum		S	0	0	0	0	0	1	0	0	1	0
419	Salix	neowilsonii		T	0	0	1	0	0	0	0	1	0	0
420	Salix	nipponica	var.mengshanensis	S	0	1	0	0	0	0	0	1	0	0
421	Salix	nujiangensis		S	0	0	1	0	0	0	0	1	0	0
422	Salix	occidentalisinensis		S	0	0	1	1	0	0	1	1	0	1
423	Salix	ochetophylla		S	0	0	0	0	0	0	1	0	0	1
424	Salix	okamotoana		S	0	0	1	0	0	0	0	1	0	0
425	Salix	omeiensis		S	0	0	1	0	0	0	0	1	0	0
426	Salix	opsimantha	var.wawashanica	S	0	0	1	0	0	0	0	1	0	0
427	Salix	opsimantha		S	0	0	1	1	0	0	1	1	0	1
428	Salix	oreinoma		S	0	0	1	1	0	0	1	1	0	1
429	Salix	oritrepha	var.amnematchinensis	S	0	1	1	0	0	1	1	1	1	1
430	Salix	oritrepha		S	0	1	1	1	0	1	1	1	1	1
431	Salix	ovatomicrophylla		S	0	0	1	1	0	0	1	1	0	1
432	Salix	paraflabellaris		S	0	0	1	0	0	0	0	1	0	0
433	Salix	paraheterochroma		S	0	0	0	0	0	0	1	0	0	1
434	Salix	paraphylicifolia		S	0	0	0	0	0	1	0	0	1	0
435	Salix	paraplesia	var.pubescens	T	0	0	1	0	0	0	0	1	0	0
436	Salix	paraplesia	var.subintegra	T	0	0	0	0	0	0	1	0	0	1
437	Salix	paraplesia		T	0	1	1	1	0	1	1	1	1	1
438	Salix	paratetradenia	var.yatungensis	S	0	0	1	0	0	0	1	1	0	1
439	Salix	paratetradenia		S	0	0	0	0	0	0	1	0	0	1
440	Salix	parvidenticulata		S	0	0	0	0	0	0	1	0	0	1
441	Salix	pella		S	0	0	0	0	0	0	1	0	0	1
442	Salix	pentandra	var.intermedia	S	1	0	0	0	0	0	0	1	0	0
443	Salix	pentandra	var.obovata	S	0	0	0	0	1	0	0	0	1	0
444	Salix	permollis		T	0	0	1	0	0	0	0	1	0	0
445	Salix	phaidima		T	0	0	1	0	0	0	1	1	0	1
446	Salix	phanera	var.weixiensis	T	0	0	1	0	0	0	0	1	0	0
447	Salix	phanera		T	0	1	1	1	0	1	0	1	1	0
448	Salix	pilosomicrophylla		S	0	0	1	1	0	0	1	1	0	1
449	Salix	pingliensis		T	0	1	1	0	0	0	0	1	0	0
450	Salix	piptotricha		S	0	0	1	0	0	0	0	1	0	0
451	Salix	plocotricha		S	0	1	1	0	0	1	1	1	1	1
452	Salix	polyclona		S	0	1	1	0	0	0	0	1	0	0
453	Salix	praticola		S	0	0	1	1	0	0	0	1	0	0
454	Salix	psammophila		S	0	1	0	0	1	0	0	1	1	0
455	Salix	pseudolasiogyne	var.erythrantha	T	1	1	0	0	1	0	0	1	1	0
456	Salix	pseudopermollis		S	0	1	1	0	0	0	0	1	0	0
457	Salix	pseudospissa		S	0	1	1	0	0	1	1	1	1	1
458	Salix	pseudotangii		S	0	1	1	0	0	0	0	1	0	0
459	Salix	pseudowallichiana		S	0	1	1	0	0	0	1	1	0	1
460	Salix	pseudowolohoensis		S	0	0	1	1	0	0	0	1	0	0
461	Salix	qinghaiensis	var.microphylla	T	0	1	1	0	0	1	1	1	1	1
462	Salix	qinghaiensis		T	0	1	1	0	0	1	1	1	1	1
463	Salix	qinlingica		S	0	0	1	0	0	0	0	1	0	0
464	Salix	raddeana	var.subglabra	S	1	0	0	0	0	0	0	1	0	0
465	Salix	radinostachya	var.pseudo-phanera	S	0	0	1	0	0	0	0	1	0	0
466	Salix	rehderiana	var.dolia	S	0	1	1	0	0	1	1	1	1	1
467	Salix	rehderiana		S	0	1	1	1	0	1	1	1	1	1
468	Salix	resecta		S	0	0	1	1	0	0	0	1	0	0
469	Salix	resectoides		S	0	0	1	1	0	0	1	1	0	1
470	Salix	rhododendrifolia		S	0	0	1	1	0	0	1	1	0	1
471	Salix	rhoophila		S	0	0	1	0	0	0	1	1	0	1
472	Salix	rockii		S	0	1	1	0	0	1	1	1	1	1
473	Salix	rosmarinifolia	var.tungbeiana	S	1	0	0	0	0	0	0	1	0	0
474	Salix	rosmarinifolia	var.gannanensis	S	0	0	0	0	0	0	1	0	0	1
475	Salix	rosthornii		T	0	0	1	0	0	0	1	1	0	1
476	Salix	salwinensis	var.longiamentifera	S	0	0	1	0	0	0	0	1	0	0
477	Salix	sclerophylla	var.obtusa	S	0	0	1	0	0	0	1	1	0	1
478	Salix	sclerophylla	var.tibetica	S	0	1	1	1	0	1	0	1	1	0
479	Salix	sclerophylloides		S	0	0	0	0	0	0	1	0	0	1
480	Salix	scopulicola		S	0	0	1	0	0	0	0	1	0	0
481	Salix	shandanensis		S	0	1	1	0	1	1	1	1	1	1
482	Salix	shihtsuanensis	var.glabrata	S	0	1	0	0	0	0	0	1	0	0
483	Salix	shihtsuanensis	var.globosa	S	0	1	1	0	0	1	1	1	1	1
484	Salix	shihtsuanensis	var.sessilis	S	0	0	1	0	0	0	0	1	0	0
485	Salix	shihtsuanensis		S	0	1	1	0	0	1	1	1	1	1
486	Salix	sinica	var.dentata	S	0	1	0	0	0	0	0	1	0	0
487	Salix	sinica	var.subsessilis	S	0	1	0	0	0	0	0	1	0	0
488	Salix	sinica		S	1	1	0	0	1	1	1	1	1	1
489	Salix	sinopurpurea		S	0	1	1	0	1	1	1	1	1	1
490	Salix	skvortzovii		S	1	0	0	0	0	0	0	1	0	0
491	Salix	souliei		S	0	0	1	1	0	0	1	1	0	1
492	Salix	spathulifolia		S	0	1	1	0	0	1	1	1	1	1
493	Salix	sphaeronymphe		S	0	1	1	0	0	1	1	1	1	1
494	Salix	sphaeronymphoides		T	0	0	1	1	0	0	1	1	0	1
495	Salix	spodiophylla	var.liocarpa	S	0	0	1	1	0	0	0	1	0	0
496	Salix	spodiophylla		S	0	0	1	1	0	0	0	1	0	0
497	Salix	suchowensis		S	0	1	0	0	0	0	0	1	0	0
498	Salix	sungkianica		S	1	0	0	0	0	0	0	1	0	0
499	Salix	tagawana		S	0	0	1	0	0	0	0	1	0	0
500	Salix	taipaiensis		S	0	0	1	0	0	0	0	1	0	0
501	Salix	taishanensis	var.glabra	S	0	1	0	0	0	0	0	1	0	0
502	Salix	taishanensis	var.hebeinica	S	0	1	0	0	0	0	0	1	0	0
503	Salix	taishanensis		S	0	1	0	0	0	0	0	1	0	0
504	Salix	taiwanalpina		S	0	0	1	0	0	0	0	1	0	0
505	Salix	takasagoalpina		S	0	0	1	0	0	0	0	1	0	0
506	Salix	tangii	var.angustifolia	S	0	1	1	0	0	1	1	1	1	1
507	Salix	tangii		S	0	1	0	0	0	1	1	1	1	1
508	Salix	taoensis	var.pedicellata	S	0	0	0	0	0	0	1	0	0	1
509	Salix	taoensis	var.leiocarpa	S	0	0	0	0	0	0	1	0	0	1
510	Salix	taoensis		S	0	1	1	0	0	1	1	1	1	1
511	Salix	taraikensis	var.oblanceolata	S	0	1	0	0	0	0	0	1	0	0
512	Salix	tenella	var.trichadenia	S	0	0	1	1	0	0	0	1	0	0
513	Salix	tenella		S	0	0	1	1	0	0	0	1	0	0
514	Salix	tengchongensis		S	0	0	0	1	0	0	0	1	0	0
515	Salix	triandroides		S	0	0	1	0	0	0	1	1	0	1
516	Salix	trichocarpa		T	0	0	0	0	0	0	1	0	0	1
517	Salix	vaccinioides		S	0	0	1	1	0	0	1	1	0	1
518	Salix	variegata		S	0	0	1	0	0	1	1	1	1	1
519	Salix	wallichiana	var.pachyclada	S	0	0	1	0	0	0	0	1	0	0
520	Salix	wangiana		S	0	1	1	0	0	0	1	1	0	1
521	Salix	warburgii		T	0	0	1	0	0	0	0	1	0	0
522	Salix	weixiensis		S	0	0	1	1	0	0	0	1	0	0
523	Salix	wilhelmsiana	var.leiocarpa	S	1	0	0	0	1	1	0	1	1	0
524	Salix	wilhelmsiana	var.latifolia	S	0	0	0	0	0	1	0	0	1	0
525	Salix	wilsonii		T	0	0	1	0	0	0	0	1	0	0
526	Salix	wolohoensis		S	0	0	1	1	0	0	0	1	0	0
527	Salix	wuxuhaiensis		S	0	0	0	0	0	0	1	0	0	1
528	Salix	xiaoguongshanica		S	0	0	1	0	0	0	0	1	0	0
529	Salix	xizangensis		S	0	0	0	0	0	0	1	0	0	1
530	Salix	yadongensis		S	0	0	0	0	0	0	1	0	0	1
531	Salix	yanbianica		S	1	0	0	0	0	0	0	1	0	0
532	Salix	yuhuangshanensis		S	0	0	1	0	0	0	0	1	0	0
533	Salix	yumenensis		S	0	0	0	0	0	1	0	0	1	0
534	Salix	zangica		S	0	0	1	1	0	0	1	1	0	1
535	Salix	zayulica		S	0	0	0	0	0	0	1	0	0	1
536	Salix	zhegushanica		S	0	0	0	0	0	0	1	0	0	1
537	Salix	zhouquensis		S	0	0	1	0	0	0	0	1	0	0
538	Myrica	adenophora		S	0	0	1	1	0	0	0	1	0	0
539	Myrica	nana		S	0	0	1	1	0	0	0	1	0	0
540	Carya	cathayensis		T	0	1	1	0	0	0	0	1	0	0
541	Carya	hunanensis		T	0	0	1	1	0	0	0	1	0	0
542	Carya	kweichowensis		T	0	0	1	0	0	0	0	1	0	0
543	Cyclocarya	paliurus		T	0	0	1	1	0	0	0	1	0	0
544	Engelhardia	hainanensis		T	0	0	0	1	0	0	0	1	0	0
545	Platycarya	longipes		T	0	0	1	1	0	0	0	1	0	0
546	Pterocarya	hupehensis		T	0	0	1	0	0	0	1	1	0	1
547	Pterocarya	macroptera	var.delavayi	T	0	0	1	1	0	0	1	1	0	1
548	Pterocarya	macroptera	var.insignis	T	0	0	1	1	0	0	0	1	0	0
549	Pterocarya	macroptera		T	0	0	1	1	0	1	1	1	1	1
550	Alnus	cremastogyne		T	0	1	1	0	0	1	1	1	1	1
551	Alnus	ferdinandi-coburgii		T	0	0	1	1	0	0	0	1	0	0
552	Alnus	formosana		T	0	0	1	0	0	0	0	1	0	0
553	Alnus	henryi		T	0	0	1	0	0	0	0	1	0	0
554	Alnus	lanata		T	0	0	0	0	0	0	1	0	0	1
555	Betula	albosinensis		T	0	1	1	0	0	1	1	1	1	1
556	Betula	austrosinensis		T	0	0	1	0	0	0	0	1	0	0
557	Betula	calcicola		S	0	0	1	1	0	0	0	1	0	0
558	Betula	delavayi	var.microstachya	S	0	0	1	0	0	0	1	1	0	1
559	Betula	delavayi	var.polyneura	S	0	0	1	1	0	0	0	1	0	0
560	Betula	delavayi		S	0	1	1	1	0	1	1	1	1	1
561	Betula	ermanii	var.macrostrobila	T	1	0	0	0	0	0	0	1	0	0
562	Betula	ermanii	var.yingkiliensis	T	1	0	0	0	1	1	0	1	1	0
563	Betula	fargesii		T	0	0	1	0	0	0	1	1	0	1
564	Betula	gynoterminalis		T	0	0	1	0	0	0	0	1	0	0
565	Betula	halophila		S	0	0	0	0	0	1	0	0	1	0
566	Betula	insignis		T	0	0	1	0	0	0	1	1	0	1
567	Betula	jinpingensis		T	0	0	0	1	0	0	0	1	0	0
568	Betula	jiulongensis		T	0	0	0	0	0	0	1	0	0	1
569	Betula	luminifera		T	0	0	1	0	0	1	0	1	1	0
570	Betula	potaninii		S	0	1	1	0	0	1	1	1	1	1
571	Betula	rhombibracteata		T	0	0	1	0	0	0	0	1	0	0
572	Betula	tricogemma		S	0	0	1	0	0	0	0	1	0	0
573	Carpinus	chuniana		T	0	0	1	1	0	1	1	1	1	1
574	Carpinus	cordata	var.chinensis	T	0	0	1	0	0	1	1	1	1	1
575	Carpinus	cordata	var.mollis	T	0	1	0	0	0	0	0	1	0	0
576	Carpinus	dayongiana		T	0	0	1	0	0	0	0	1	0	0
577	Carpinus	fangiana		T	0	0	1	1	0	0	0	1	0	0
578	Carpinus	fargesiana	var.hwai	T	0	0	1	0	0	0	1	1	0	1
579	Carpinus	fargesiana		T	0	0	1	0	0	1	1	1	1	1
580	Carpinus	firmifolia		T	0	0	1	0	0	0	0	1	0	0
581	Carpinus	glanduloso-punctata		T	0	1	1	0	0	0	0	1	0	0
582	Carpinus	hebestoma		T	0	0	1	0	0	0	0	1	0	0
583	Carpinus	henryana		T	0	1	1	1	0	1	1	1	1	1
584	Carpinus	hupeana		T	0	0	1	0	0	0	0	1	0	0
585	Carpinus	kawakamii		T	0	0	1	0	0	0	0	1	0	0
586	Carpinus	kweichowensis		T	0	0	1	1	0	0	0	1	0	0
587	Carpinus	londoniana	var.latifolia	T	0	0	1	0	0	0	0	1	0	0
588	Carpinus	londoniana	var.xiphobracteata	T	0	0	1	0	0	0	0	1	0	0
589	Carpinus	londoniana	var.lanceolata	T	0	0	0	1	0	0	0	1	0	0
590	Carpinus	microphylla		S	0	0	1	0	0	0	0	1	0	0
591	Carpinus	minutiserrata		T	0	0	1	0	0	0	0	1	0	0
592	Carpinus	mollicoma		T	0	0	1	1	0	0	1	1	0	1
593	Carpinus	monbeigiana		T	0	0	1	1	0	0	1	1	0	1
594	Carpinus	oblongifolia		T	0	0	1	0	0	0	0	1	0	0
595	Carpinus	omeiensis		T	0	0	1	0	0	0	1	1	0	1
596	Carpinus	polyneura		T	0	1	1	1	0	0	0	1	0	0
597	Carpinus	purpurinervis		T	0	0	1	1	0	0	0	1	0	0
598	Carpinus	putoensis		T	0	0	1	0	0	0	0	1	0	0
599	Carpinus	rankanensis	var.matsudae	T	0	0	1	0	0	0	0	1	0	0
600	Carpinus	rankanensis		T	0	0	1	0	0	0	0	1	0	0
601	Carpinus	rupestris		T	0	0	1	1	0	0	0	1	0	0
602	Carpinus	shensiensis		T	0	1	1	0	0	1	1	1	1	1
603	Carpinus	stipulata		T	0	1	1	0	0	1	1	1	1	1
604	Carpinus	sungpanensis		T	0	0	0	0	0	0	1	0	0	1
605	Carpinus	tientaiensis		T	0	0	1	0	0	0	0	1	0	0
606	Carpinus	tsaiana		T	0	0	1	1	0	0	0	1	0	0
607	Carpinus	tsunyihensis		T	0	0	1	0	0	0	0	1	0	0
608	Carpinus	viminea	var.chiukiangensis	T	0	0	1	1	0	0	1	1	0	1
609	Corylus	chinensis		T	0	0	1	0	0	1	1	1	1	1
610	Corylus	fargesii		T	0	0	1	0	0	1	1	1	1	1
611	Corylus	ferox	var.thibetica	T	0	1	1	0	0	1	1	1	1	1
612	Corylus	heterophylla	var.sutchuenensis	S	0	0	1	0	0	1	1	1	1	1
613	Corylus	wangii		T	0	0	1	0	0	0	0	1	0	0
614	Corylus	yunnanensis		S	0	0	1	0	0	0	0	1	0	0
615	Ostrya	multinervis		T	0	1	1	0	0	0	1	1	0	1
616	Ostrya	rehderiana		T	0	0	1	0	0	0	0	1	0	0
617	Ostrya	trichocarpa		T	0	0	0	1	0	0	0	1	0	0
618	Ostrya	yunnanensis		T	0	0	1	0	0	0	0	1	0	0
619	Ostryopsis	davidiana		S	1	1	1	0	1	1	1	1	1	1
620	Ostryopsis	nobilis		S	0	0	1	1	0	0	0	1	0	0
621	Castanea	henryi		T	0	0	1	0	0	0	0	1	0	0
622	Castanea	seguinii		T	0	0	1	0	0	0	0	1	0	0
623	Castanopsis	amabilis		T	0	0	0	1	0	0	0	1	0	0
624	Castanopsis	carlesii	var.spinulosa	T	0	0	1	1	0	0	0	1	0	0
625	Castanopsis	carlesii		T	0	0	1	1	0	0	0	1	0	0
626	Castanopsis	chunii		T	0	0	1	0	0	0	0	1	0	0
627	Castanopsis	concinna		T	0	0	1	1	0	0	0	1	0	0
628	Castanopsis	damingshanensis		T	0	0	1	0	0	0	0	1	0	0
629	Castanopsis	delavayi		T	0	0	1	1	0	0	0	1	0	0
630	Castanopsis	densispinosa		T	0	0	0	1	0	0	0	1	0	0
631	Castanopsis	eyrei		T	0	0	1	0	0	0	1	1	0	1
632	Castanopsis	fargesii		T	0	0	1	0	0	0	1	1	0	1
633	Castanopsis	fordii		T	0	0	1	1	0	0	0	1	0	0
634	Castanopsis	globigemmata		T	0	0	0	1	0	0	0	1	0	0
635	Castanopsis	hainanensis		T	0	0	0	1	0	0	0	1	0	0
636	Castanopsis	hairocarpa		T	0	0	0	1	0	0	0	1	0	0
637	Castanopsis	hupehensis		T	0	0	1	0	0	0	1	1	0	1
638	Castanopsis	jianfenglingensis		T	0	0	0	1	0	0	0	1	0	0
639	Castanopsis	kweichowensis		T	0	0	1	1	0	0	0	1	0	0
640	Castanopsis	ledongensis		T	0	0	0	1	0	0	0	1	0	0
641	Castanopsis	longzhouica		T	0	0	0	1	0	0	0	1	0	0
642	Castanopsis	megaphylla		T	0	0	0	1	0	0	0	1	0	0
643	Castanopsis	nigrescens		T	0	0	1	1	0	0	0	1	0	0
644	Castanopsis	oblonga		T	0	0	0	1	0	0	0	1	0	0
645	Castanopsis	oleifera		T	0	0	0	1	0	0	0	1	0	0
646	Castanopsis	orthacantha		T	0	0	1	1	0	0	0	1	0	0
647	Castanopsis	platyacantha		T	0	0	1	1	0	0	0	1	0	0
648	Castanopsis	qingbeiensis		T	0	0	0	1	0	0	0	1	0	0
649	Castanopsis	remotidenticulata		T	0	0	0	1	0	0	0	1	0	0
650	Castanopsis	rufotomentosa		T	0	0	0	1	0	0	0	1	0	0
651	Castanopsis	sclerophylla		T	0	0	1	1	0	0	1	1	0	1
652	Castanopsis	subuliformis		T	0	0	1	1	0	0	0	1	0	0
653	Castanopsis	tibetana		T	0	0	1	0	0	0	0	1	0	0
654	Castanopsis	uraiana		T	0	0	1	1	0	0	0	1	0	0
655	Castanopsis	wenchangensis		T	0	0	0	1	0	0	0	1	0	0
656	Castanopsis	wuzhishangensis		T	0	0	0	1	0	0	0	1	0	0
657	Castanopsis	xichouensis		T	0	0	0	1	0	0	0	1	0	0
658	Cyclobalanopsis	albicaulis		T	0	0	0	1	0	0	0	1	0	0
659	Cyclobalanopsis	argyrotricha		T	0	0	1	0	0	0	0	1	0	0
660	Cyclobalanopsis	austroglauca		T	0	0	0	1	0	0	0	1	0	0
661	Cyclobalanopsis	bella		T	0	0	0	1	0	0	0	1	0	0
662	Cyclobalanopsis	championii		T	0	0	0	1	0	0	0	1	0	0
663	Cyclobalanopsis	chingsiensis		T	0	0	1	1	0	0	0	1	0	0
664	Cyclobalanopsis	chungii		T	0	0	1	1	0	0	0	1	0	0
665	Cyclobalanopsis	daimingshanensis		T	0	0	1	0	0	0	0	1	0	0
666	Cyclobalanopsis	delavayi		T	0	0	1	1	0	0	0	1	0	0
667	Cyclobalanopsis	delicatula		T	0	0	1	1	0	0	0	1	0	0
668	Cyclobalanopsis	dinghuensis		T	0	0	1	0	0	0	0	1	0	0
669	Cyclobalanopsis	disciformis		T	0	0	1	1	0	0	0	1	0	0
670	Cyclobalanopsis	elevaticostata		T	0	0	1	0	0	0	0	1	0	0
671	Cyclobalanopsis	glaucoides		T	0	0	1	1	0	0	0	1	0	0
672	Cyclobalanopsis	gracilis		T	0	0	1	0	0	0	1	1	0	1
673	Cyclobalanopsis	hui		T	0	0	1	1	0	0	0	1	0	0
674	Cyclobalanopsis	hypophaea		T	0	0	1	0	0	0	0	1	0	0
675	Cyclobalanopsis	jenseniana		T	0	0	1	0	0	0	0	1	0	0
676	Cyclobalanopsis	jinpinensis		T	0	0	0	1	0	0	0	1	0	0
677	Cyclobalanopsis	kiukiangensis		T	0	0	1	1	0	0	1	1	0	1
678	Cyclobalanopsis	kouangsiensis		T	0	0	0	1	0	0	0	1	0	0
679	Cyclobalanopsis	litoralis		T	0	0	0	1	0	0	0	1	0	0
680	Cyclobalanopsis	litseoides		T	0	0	1	1	0	0	0	1	0	0
681	Cyclobalanopsis	longinux		T	0	0	1	0	0	0	0	1	0	0
682	Cyclobalanopsis	lungmaiensis		T	0	0	0	1	0	0	0	1	0	0
683	Cyclobalanopsis	morii		T	0	0	1	0	0	0	0	1	0	0
684	Cyclobalanopsis	motuoensis		T	0	0	0	0	0	0	1	0	0	1
685	Cyclobalanopsis	multiervis		T	0	0	1	1	0	0	1	1	0	1
686	Cyclobalanopsis	ningangensis		T	0	0	1	1	0	0	0	1	0	0
687	Cyclobalanopsis	obovatifolia		T	0	0	1	1	0	0	0	1	0	0
688	Cyclobalanopsis	pachyloma		T	0	0	1	0	0	0	0	1	0	0
689	Cyclobalanopsis	patelliformis		T	0	0	1	1	0	0	0	1	0	0
690	Cyclobalanopsis	pentacycla		T	0	0	0	1	0	0	0	1	0	0
691	Cyclobalanopsis	phanera		T	0	0	0	1	0	0	0	1	0	0
692	Cyclobalanopsis	sichourensis		T	0	0	0	1	0	0	0	1	0	0
693	Cyclobalanopsis	stenophylloides		T	0	0	1	0	0	0	0	1	0	0
694	Cyclobalanopsis	stewardiana		T	0	0	1	0	0	0	1	1	0	1
695	Cyclobalanopsis	subhinoidea		T	0	0	0	1	0	0	0	1	0	0
696	Cyclobalanopsis	tenuicupula		T	0	0	0	1	0	0	0	1	0	0
697	Cyclobalanopsis	tiaoloshanica		T	0	0	0	1	0	0	0	1	0	0
698	Cyclobalanopsis	tomentosinervis		T	0	0	1	1	0	0	0	1	0	0
699	Cyclobalanopsis	yingjiangensis		T	0	0	1	0	0	0	0	1	0	0
700	Cyclobalanopsis	yonganensis		T	0	0	1	0	0	0	0	1	0	0
701	Fagus	engleriana		T	0	0	1	1	0	0	0	1	0	0
702	Fagus	hayatae		T	0	0	1	0	0	0	1	1	0	1
703	Fagus	lucida		T	0	0	1	0	0	0	1	1	0	1
704	Lithocarpus	amoenus		T	0	0	1	1	0	0	0	1	0	0
705	Lithocarpus	apricus		T	0	0	1	0	0	0	0	1	0	0
706	Lithocarpus	attenuatus		T	0	0	1	1	0	0	0	1	0	0
707	Lithocarpus	brachystachyus		T	0	0	0	1	0	0	0	1	0	0
708	Lithocarpus	brevicaudatus		T	0	0	1	1	0	0	1	1	0	1
709	Lithocarpus	calolepis		T	0	0	0	1	0	0	0	1	0	0
710	Lithocarpus	calophyllus		T	0	0	1	0	0	0	0	1	0	0
711	Lithocarpus	carolineae		T	0	0	0	1	0	0	0	1	0	0
712	Lithocarpus	caudatilimbus		T	0	0	0	1	0	0	0	1	0	0
713	Lithocarpus	chifui		T	0	0	1	1	0	0	0	1	0	0
714	Lithocarpus	chiungchungensis		T	0	0	0	1	0	0	0	1	0	0
715	Lithocarpus	chrysocomus		T	0	0	1	1	0	0	0	1	0	0
716	Lithocarpus	cinereus		T	0	0	0	1	0	0	0	1	0	0
717	Lithocarpus	cleistocarpus	var.omeiensis	T	0	0	1	1	0	0	0	1	0	0
718	Lithocarpus	cleistocarpus		T	0	0	1	0	0	0	0	1	0	0
719	Lithocarpus	confinis		T	0	0	1	1	0	0	0	1	0	0
720	Lithocarpus	corneus	var.fructuosus	T	0	0	1	1	0	0	0	1	0	0
721	Lithocarpus	corneus	var.angustifolius	T	0	0	0	1	0	0	0	1	0	0
722	Lithocarpus	corneus	var.rhytidophyllus	T	0	0	0	1	0	0	0	1	0	0
723	Lithocarpus	corneus	var.hainanensis	T	0	0	0	1	0	0	0	1	0	0
724	Lithocarpus	cucullatus		T	0	0	1	0	0	0	0	1	0	0
725	Lithocarpus	damiaoshanicus		T	0	0	1	0	0	0	0	1	0	0
726	Lithocarpus	dodonaeifolius		T	0	0	1	0	0	0	0	1	0	0
727	Lithocarpus	elizabethae		T	0	0	1	1	0	0	0	1	0	0
728	Lithocarpus	elmerrillii		T	0	0	0	1	0	0	0	1	0	0
729	Lithocarpus	eriobotryoides		T	0	0	1	0	0	0	1	1	0	1
730	Lithocarpus	fangii		T	0	0	1	0	0	0	1	1	0	1
731	Lithocarpus	fenzelianus		T	0	0	0	1	0	0	0	1	0	0
732	Lithocarpus	floccosus		T	0	0	1	1	0	0	0	1	0	0
733	Lithocarpus	fohaiensis		T	0	0	0	1	0	0	0	1	0	0
734	Lithocarpus	formosanus		T	0	0	1	0	0	0	0	1	0	0
735	Lithocarpus	gaoligongensis		T	0	0	1	0	0	0	0	1	0	0
736	Lithocarpus	haipinii		T	0	0	1	1	0	0	0	1	0	0
737	Lithocarpus	hancei		T	0	0	1	1	0	0	0	1	0	0
738	Lithocarpus	handelianus		T	0	0	0	1	0	0	0	1	0	0
739	Lithocarpus	harlandii		T	0	0	1	1	0	0	0	1	0	0
740	Lithocarpus	henryi		T	0	0	1	0	0	0	1	1	0	1
741	Lithocarpus	howii		T	0	0	0	1	0	0	0	1	0	0
742	Lithocarpus	hypoglaucus		T	0	0	1	1	0	0	0	1	0	0
743	Lithocarpus	irwinii		T	0	0	1	1	0	0	0	1	0	0
744	Lithocarpus	iteaphyllus		T	0	0	1	1	0	0	0	1	0	0
745	Lithocarpus	ithyphyllus		T	0	0	1	0	0	0	0	1	0	0
746	Lithocarpus	kawakamii		T	0	0	1	0	0	0	0	1	0	0
747	Lithocarpus	konishii		T	0	0	1	1	0	0	0	1	0	0
748	Lithocarpus	laetus		T	0	0	0	1	0	0	0	1	0	0
749	Lithocarpus	lepidocarpus		T	0	0	1	0	0	0	0	1	0	0
750	Lithocarpus	leucodermis		T	0	0	0	1	0	0	0	1	0	0
751	Lithocarpus	levis		T	0	0	1	0	0	0	0	1	0	0
752	Lithocarpus	litseifolius	var.pubescens	T	0	0	1	0	0	0	0	1	0	0
753	Lithocarpus	longanoides		T	0	0	0	1	0	0	0	1	0	0
754	Lithocarpus	macilentus		T	0	0	1	1	0	0	0	1	0	0
755	Lithocarpus	mairei		T	0	0	1	0	0	0	0	1	0	0
756	Lithocarpus	melanochromus		T	0	0	1	1	0	0	0	1	0	0
757	Lithocarpus	mianningensis		T	0	0	0	1	0	0	0	1	0	0
758	Lithocarpus	naiadarum		T	0	0	0	1	0	0	0	1	0	0
759	Lithocarpus	nantoensis		T	0	0	1	0	0	0	0	1	0	0
760	Lithocarpus	nitidinux		T	0	0	1	1	0	0	0	1	0	0
761	Lithocarpus	oblanceolatus		T	0	0	1	0	0	0	0	1	0	0
762	Lithocarpus	obovatilimbus		T	0	0	0	1	0	0	0	1	0	0
763	Lithocarpus	obscurus		T	0	0	1	1	0	0	1	1	0	1
764	Lithocarpus	paihengii		T	0	0	1	1	0	0	0	1	0	0
765	Lithocarpus	paniculatus		T	0	0	1	1	0	0	0	1	0	0
766	Lithocarpus	propinquus		T	0	0	0	1	0	0	0	1	0	0
767	Lithocarpus	pseudoxizangensis		T	0	0	0	0	0	0	1	0	0	1
768	Lithocarpus	qinzhouicus		T	0	0	1	1	0	0	0	1	0	0
769	Lithocarpus	quercifolius		T	0	0	1	1	0	0	0	1	0	0
770	Lithocarpus	rosthornii		T	0	0	1	1	0	0	1	1	0	1
771	Lithocarpus	shinsuiensis		T	0	0	1	0	0	0	0	1	0	0
772	Lithocarpus	skanianus		T	0	0	0	1	0	0	0	1	0	0
773	Lithocarpus	tabularis		T	0	0	0	1	0	0	0	1	0	0
774	Lithocarpus	taitoensis		T	0	0	1	0	0	0	0	1	0	0
775	Lithocarpus	talangensis		T	0	0	0	1	0	0	0	1	0	0
776	Lithocarpus	uvariifolius	var.ellipticus	T	0	0	1	1	0	0	0	1	0	0
777	Lithocarpus	uvariifolius		T	0	0	1	1	0	0	0	1	0	0
778	Lithocarpus	xizangensis		T	0	0	0	0	0	0	1	0	0	1
779	Lithocarpus	yongfuensis		T	0	0	1	0	0	0	0	1	0	0
780	Quercus	acrodonta		T	0	0	1	0	0	1	0	1	1	0
781	Quercus	aliena	var.pekingensis	T	0	1	0	0	0	0	0	1	0	0
782	Quercus	baronii		T	0	1	1	0	0	1	1	1	1	1
783	Quercus	bawanglingensis		T	0	0	0	1	0	0	0	1	0	0
784	Quercus	chenii		T	0	1	1	0	0	0	1	1	0	1
785	Quercus	cocciferoides		T	0	1	1	1	0	0	0	1	0	0
786	Quercus	dolicholepis		T	0	1	1	0	0	1	0	1	1	0
787	Quercus	engleriana		T	0	0	1	0	0	0	1	1	0	1
788	Quercus	fabri		T	0	0	1	0	0	0	0	1	0	0
789	Cyclobalanopsis	fulvisericeus		T	0	0	1	1	0	0	0	1	0	0
790	Quercus	guajavifolia		T	0	0	1	1	0	0	0	1	0	0
791	Quercus	multinervis		S	0	1	1	1	0	0	1	1	0	1
792	Quercus	oxyphylla		T	0	0	1	1	0	1	1	1	1	1
793	Quercus	senescens		T	0	0	1	1	0	0	1	1	0	1
794	Quercus	tarokoensis		T	0	0	1	0	0	0	0	1	0	0
795	Quercus	utilis		T	0	0	1	1	0	0	0	1	0	0
796	Quercus	yunnanensis		T	0	0	1	1	0	0	0	1	0	0
797	Aphananthe	aspera	var.pubescens	T	0	0	0	1	0	0	0	1	0	0
798	Celtis	cerasifera		T	0	1	1	1	0	0	1	1	0	1
799	Celtis	chekiangensis		T	0	1	1	0	0	0	0	1	0	0
800	Celtis	julianae		T	0	0	1	0	0	0	1	1	0	1
801	Celtis	vandervoetiana		T	0	0	1	0	0	0	0	1	0	0
802	Pteroceltis	tatarinowii		T	0	1	1	0	0	1	1	1	1	1
803	Trema	cannabina	var.dielsiana	S	0	0	1	0	0	0	1	1	0	1
804	Trema	levigata		T	0	0	1	1	0	0	0	1	0	0
805	Trema	nitida		T	0	0	1	1	0	0	0	1	0	0
806	Ulmus	androssowii	var.subhirsuta	T	0	0	1	1	0	0	1	1	0	1
807	Ulmus	bergmanniana	var.lasiophylla	T	0	0	1	1	0	0	1	1	0	1
808	Ulmus	bergmanniana		T	0	1	1	1	0	1	1	1	1	1
809	Ulmus	castaneifolia		T	0	0	1	0	0	0	0	1	0	0
810	Ulmus	changii	var.kunmingensis	T	0	0	1	1	0	0	0	1	0	0
811	Ulmus	changii		T	0	0	1	1	0	0	0	1	0	0
812	Ulmus	chenmoui		T	0	1	1	0	0	0	0	1	0	0
813	Ulmus	elongata		T	0	1	1	0	0	0	0	1	0	0
814	Ulmus	gaussenii		T	0	1	1	0	0	0	0	1	0	0
815	Ulmus	glaucescens	var.lasiocarpa	T	1	0	0	0	1	1	1	1	1	1
816	Ulmus	glaucescens		T	1	1	0	0	1	1	1	1	1	1
817	Ulmus	harbinensis		T	1	0	0	0	0	0	0	1	0	0
818	Ulmus	lamellosa		T	0	1	0	0	0	0	0	1	0	0
819	Ulmus	macrocarpa	var.glabra	T	1	0	0	0	0	0	0	1	0	0
820	Ulmus	microcarpus		T	0	0	0	0	0	0	1	0	0	1
821	Ulmus	prunifolia		T	0	0	1	0	0	0	1	1	0	1
822	Ulmus	pseudopropinqua		T	1	0	0	0	0	0	0	1	0	0
823	Ulmus	szechuanica		T	0	0	1	0	0	0	1	1	0	1
824	Ulmus	uyematsui		T	0	0	1	0	0	0	0	1	0	0
825	Zelkova	schneideriana		T	0	0	1	0	0	1	1	1	1	1
826	Zelkova	sinica		T	0	1	1	0	1	1	1	1	1	1
827	Artocarpus	gongshanensis		T	0	0	1	0	0	0	0	1	0	0
828	Artocarpus	hypargyreus		T	0	0	0	1	0	0	0	1	0	0
829	Artocarpus	nanchuanensis		T	0	0	1	0	0	0	0	1	0	0
830	Artocarpus	nigrifolius		T	0	0	0	1	0	0	0	1	0	0
831	Artocarpus	pithecogallus		T	0	0	0	1	0	0	0	1	0	0
832	Ficus	beipeiensis		T	0	0	1	0	0	0	0	1	0	0
833	Ficus	ciliata		S	0	0	1	0	0	0	0	1	0	0
834	Ficus	daimingshanensis		S	0	0	1	1	0	0	0	1	0	0
835	Ficus	dinganensis		S	0	0	0	1	0	0	0	1	0	0
836	Ficus	filicauda	var.longipes	T	0	0	0	0	0	0	1	0	0	1
837	Ficus	fusuiensis		S	0	0	0	1	0	0	0	1	0	0
838	Ficus	gasparriniana	var.esquirolii	S	0	0	1	0	0	0	0	1	0	0
839	Ficus	guangxiensis		WV	0	0	1	1	0	0	0	1	0	0
840	Ficus	guizhouensis		S	0	0	1	1	0	0	0	1	0	0
841	Ficus	napoensis		S	0	0	1	1	0	0	0	1	0	0
842	Ficus	ovatifolia		S	0	0	0	1	0	0	0	1	0	0
843	Ficus	polynervis		S	0	0	0	1	0	0	0	1	0	0
844	Actinidia	cylindrica	var.reticulata	WV	0	0	1	0	0	0	0	1	0	0
845	Syzygium	infra-rubiginosum		WV	0	0	0	1	0	0	0	1	0	0
846	Qiongzhuea	verruculosa		S	0	0	1	0	0	0	1	1	0	1
847	Fargesia	elegans		S	0	0	1	0	0	0	1	1	0	1
848	Fargesia	dulcicula		S	0	0	1	0	0	0	1	1	0	1
849	Fargesia	exposita		S	0	0	1	0	0	0	1	1	0	1
850	Fargesia	maluo		S	0	0	1	0	0	0	1	1	0	1
851	Ficus	pubigera	var.reticulata	V	0	0	1	1	0	0	0	1	0	0
852	Ficus	ruyuanensis		S	0	0	1	1	0	0	0	1	0	0
853	Ficus	sarmentosa	var.duclouxii	S	0	0	1	1	0	0	0	1	0	0
854	Ficus	sarmentosa	var.henryi	S	0	0	1	0	0	1	0	1	1	0
855	Ficus	sinociliata		S	0	0	1	0	0	0	0	1	0	0
856	Ficus	tannoensis		S	0	0	1	0	0	0	0	1	0	0
857	Ficus	trivia	var.laevigata	S	0	0	1	1	0	0	0	1	0	0
858	Ficus	tsiangii		S	0	0	1	1	0	0	0	1	0	0
859	Ficus	undulata		S	0	0	1	0	0	0	0	1	0	0
860	Ficus	vaccinioides		S	0	0	1	0	0	0	0	1	0	0
861	Ficus	yunnanensis		T	0	0	1	1	0	0	0	1	0	0
862	Humulus	yunnanensis		P	0	0	1	1	0	0	0	1	0	0
863	Morus	alba	var.multicaulis	T	0	1	1	0	0	0	1	1	0	1
864	Morus	cathayana	var.gongshanensis	T	0	0	1	0	0	0	0	1	0	0
865	Morus	liboensis		T	0	0	1	0	0	0	0	1	0	0
866	Morus	notabilis		T	0	0	1	1	0	0	0	1	0	0
867	Morus	trilobata		T	0	0	1	0	0	0	0	1	0	0
868	Morus	wittiorum		T	0	0	1	1	0	0	0	1	0	0
869	Boehmeria	allophylla		P	0	0	1	0	0	0	0	1	0	0
870	Boehmeria	densiglomerata		P	0	0	1	0	0	0	0	1	0	0
871	Boehmeria	dolichostachya	var.mollis	HS	0	0	1	1	0	0	0	1	0	0
872	Boehmeria	dolichostachya		HS	0	0	1	1	0	0	0	1	0	0
873	Boehmeria	formosana	var.stricta	HS	0	0	1	1	0	0	0	1	0	0
874	Boehmeria	ingjiangensis		S	0	0	0	1	0	0	0	1	0	0
875	Boehmeria	lohuiensis		S	0	0	0	1	0	0	0	1	0	0
876	Boehmeria	umbrosa		P	0	0	1	1	0	0	0	1	0	0
877	Boehmeria	zollingeriana	var.podocarpa	HS	0	0	1	0	0	0	0	1	0	0
878	Cladopus	chinensis		H	0	0	1	1	0	0	0	1	0	0
879	Dalzellia	sessilis		H	0	0	1	0	0	0	0	1	0	0
880	Dendrocnide	kotoensis		T	0	0	1	0	0	0	0	1	0	0
881	Elatostema	acuminatum	var.striolatum	HS	0	0	1	0	0	0	0	1	0	0
882	Elatostema	acuteserratum		P	0	0	1	0	0	0	0	1	0	0
883	Elatostema	acutitepalum		H	0	0	1	0	0	0	0	1	0	0
884	Elatostema	albopilosum		P	0	0	1	1	0	0	0	1	0	0
885	Elatostema	aliferum		P	0	0	1	0	0	0	1	1	0	1
886	Elatostema	alnifolium		P	0	0	0	1	0	0	0	1	0	0
887	Elatostema	angulosum		P	0	0	1	0	0	0	0	1	0	0
888	Elatostema	angustitepalum		H	0	0	0	0	0	0	1	0	0	1
889	Elatostema	asterocephalum		P	0	0	0	1	0	0	0	1	0	0
890	Elatostema	attenuatum		P	0	0	0	1	0	0	0	1	0	0
891	Elatostema	auriculatum	var.strigosum	P	0	0	0	0	0	0	1	0	0	1
892	Elatostema	auriculatum		P	0	0	1	1	0	0	1	1	0	1
893	Elatostema	baiseense		HS	0	0	1	0	0	0	0	1	0	0
894	Elatostema	beibengense		HS	0	0	0	0	0	0	1	0	0	1
895	Elatostema	boehmerioides		HS	0	0	0	0	0	0	1	0	0	1
896	Elatostema	bracteosum		P	0	0	1	0	0	0	0	1	0	0
897	Elatostema	breviacuminatum		P	0	0	0	1	0	0	0	1	0	0
898	Elatostema	brevipedunculatum		P	0	0	1	0	0	0	0	1	0	0
899	Elatostema	brunneinerve		P	0	0	1	0	0	0	0	1	0	0
900	Elatostema	calciferum		P	0	0	1	0	0	0	0	1	0	0
901	Elatostema	coriaceifolium		P	0	0	1	0	0	0	0	1	0	0
902	Elatostema	crassiusculum		P	0	0	0	1	0	0	0	1	0	0
903	Elatostema	crenatum		HS	0	0	0	1	0	0	0	1	0	0
904	Elatostema	crispulum		P	0	0	1	0	0	0	0	1	0	0
905	Elatostema	cuneiforme	var.gracilipes	P	0	0	0	0	0	0	1	0	0	1
906	Elatostema	cuneiforme		P	0	0	0	0	0	0	1	0	0	1
907	Elatostema	cuspidatum	var.dolichoceras	P	0	0	0	1	0	0	0	1	0	0
908	Elatostema	cyrtandrifolium	var.brevicaudatum	P	0	0	1	0	0	0	0	1	0	0
909	Elatostema	didymocephalum		H	0	0	0	0	0	0	1	0	0	1
910	Elatostema	dissectoides		P	0	0	1	1	0	0	1	1	0	1
911	Elatostema	dulongense		H	0	0	1	0	0	0	0	1	0	0
912	Elatostema	ebracteatum		H	0	0	0	0	0	0	1	0	0	1
913	Elatostema	eriocephalum		H	0	0	0	0	0	0	1	0	0	1
914	Elatostema	ferrugineum		H	0	0	1	0	0	0	0	1	0	0
915	Elatostema	ficoides	var.puberulum	P	0	0	1	0	0	0	0	1	0	0
916	Elatostema	filipes	var.floribundum	P	0	0	0	1	0	0	0	1	0	0
917	Elatostema	filipes		P	0	0	1	1	0	0	0	1	0	0
918	Elatostema	glochidioides		P	0	0	1	0	0	0	0	1	0	0
919	Elatostema	goniocephalum		P	0	0	1	0	0	0	0	1	0	0
920	Elatostema	gueilinense		A	0	0	1	0	0	0	0	1	0	0
921	Elatostema	gungshanense		H	0	0	1	0	0	0	1	1	0	1
922	Elatostema	hekouense		P	0	0	0	1	0	0	0	1	0	0
923	Elatostema	hirtellipedunculatum		P	0	0	1	0	0	0	0	1	0	0
924	Elatostema	hirtellum		S	0	0	1	0	0	0	0	1	0	0
925	Elatostema	hypoglaucum		P	0	0	1	0	0	0	0	1	0	0
926	Elatostema	ichangense		P	0	0	1	1	0	0	1	1	0	1
927	Elatostema	jinpingense		P	0	0	0	1	0	0	0	1	0	0
928	Elatostema	lasiocephalum		P	0	0	1	0	0	0	0	1	0	0
929	Elatostema	laxisericeum		H	0	0	0	1	0	0	0	1	0	0
930	Elatostema	leucocephalum		H	0	0	1	0	0	0	0	1	0	0
931	Elatostema	liboense		HS	0	0	1	0	0	0	0	1	0	0
932	Elatostema	lihengianum		HS	0	0	1	0	0	0	0	1	0	0
933	Elatostema	litseifolium		H	0	0	0	0	0	0	1	0	0	1
934	Elatostema	longibracteatum		P	0	0	0	1	0	0	0	1	0	0
935	Elatostema	longipes		P	0	0	1	0	0	0	0	1	0	0
936	Elatostema	lungzhouense		P	0	0	1	0	0	0	0	1	0	0
937	Elatostema	luxiense		P	0	0	1	0	0	0	0	1	0	0
938	Elatostema	mabienense	var.sexbracteatum	P	0	0	1	0	0	0	0	1	0	0
939	Elatostema	mabienense		P	0	0	1	1	0	0	0	1	0	0
940	Elatostema	manhaoense		H	0	0	1	1	0	0	0	1	0	0
941	Elatostema	menglunense		P	0	0	0	1	0	0	0	1	0	0
942	Elatostema	microdontum		P	0	0	0	1	0	0	0	1	0	0
943	Elatostema	microtrichum		P	0	0	0	1	0	0	0	1	0	0
944	Elatostema	minutifurfuraceum		P	0	0	0	1	0	0	0	1	0	0
945	Elatostema	multicanaliculatum		P	0	0	1	0	0	0	0	1	0	0
946	Elatostema	myrtillus		P	0	0	1	1	0	0	0	1	0	0
947	Elatostema	nanchuanense		P	0	0	1	0	0	0	1	1	0	1
948	Elatostema	napoense		P	0	0	1	0	0	0	0	1	0	0
949	Elatostema	nasutum	var.puberulum	P	0	0	0	1	0	0	0	1	0	0
950	Elatostema	oblongifolium		P	0	0	1	0	0	0	1	1	0	1
951	Elatostema	obscurinerve		P	0	0	1	1	0	0	0	1	0	0
952	Elatostema	obtusidentatum		HS	0	0	1	0	0	0	0	1	0	0
953	Elatostema	omeiense		P	0	0	1	0	0	0	0	1	0	0
954	Elatostema	oreocnidioides		HS	0	0	1	0	0	0	0	1	0	0
955	Elatostema	pachyceras		P	0	0	1	0	0	0	0	1	0	0
956	Elatostema	parvum	var.brevicuspis	P	0	0	0	0	0	0	1	0	0	1
957	Elatostema	pergameneum		S	0	0	1	0	0	0	0	1	0	0
958	Elatostema	platyceras		P	0	0	1	0	0	0	0	1	0	0
959	Elatostema	polystachyoides		P	0	0	0	1	0	0	0	1	0	0
960	Elatostema	prunifolium		P	0	0	1	0	0	0	0	1	0	0
961	Elatostema	pseudobrachyodontum		P	0	0	1	0	0	0	0	1	0	0
962	Elatostema	pseudocuspidatum		P	0	0	1	0	0	0	0	1	0	0
963	Elatostema	pseudodissectum		P	0	0	1	1	0	0	0	1	0	0
964	Elatostema	pseudoficoides		P	0	0	1	1	0	0	0	1	0	0
965	Elatostema	pubipes		H	0	0	0	1	0	0	0	1	0	0
966	Elatostema	pycnodontum		P	0	0	1	1	0	0	0	1	0	0
967	Elatostema	ramosum		P	0	0	1	1	0	0	0	1	0	0
968	Elatostema	recticaudatum		HS	0	0	0	0	0	0	1	0	0	1
969	Elatostema	retrohirtum		P	0	0	1	1	0	0	0	1	0	0
970	Elatostema	rivulare		P	0	0	1	0	0	0	0	1	0	0
971	Elatostema	schizocephalum		P	0	0	1	1	0	0	0	1	0	0
972	Elatostema	setulosum		P	0	0	1	0	0	0	0	1	0	0
973	Elatostema	shanglinense		P	0	0	1	0	0	0	0	1	0	0
974	Elatostema	sinense	var.xinningense	P	0	0	1	0	0	0	0	1	0	0
975	Elatostema	sinense	var.longecornutum	P	0	0	1	1	0	0	0	1	0	0
976	Elatostema	sinense		P	0	0	1	1	0	0	0	1	0	0
977	Elatostema	stewardii		P	0	1	1	0	0	0	1	1	0	1
978	Elatostema	stigmatosum		P	0	0	1	0	0	0	0	1	0	0
979	Elatostema	strigillosum		P	0	0	1	0	0	0	0	1	0	0
980	Elatostema	strigulosum		H	0	0	1	0	0	0	1	1	0	1
981	Elatostema	subcoriaceum		P	0	0	1	0	0	0	0	1	0	0
982	Elatostema	subcuspidatum		P	0	0	1	0	0	0	0	1	0	0
983	Elatostema	subpenninerve		P	0	0	1	0	0	0	0	1	0	0
984	Elatostema	subtrichotomum		P	0	0	1	1	0	0	0	1	0	0
985	Elatostema	tenuicaudatoides	var.orientale	HS	0	0	1	0	0	0	0	1	0	0
986	Elatostema	tenuicaudatoides		HS	0	0	1	1	0	0	1	1	0	1
987	Elatostema	tenuicaudatum	var.lasiocladum	HS	0	0	0	1	0	0	0	1	0	0
988	Elatostema	tenuicaudatoides		P	0	0	1	0	0	0	1	1	0	1
989	Elatostema	tenuifolium		P	0	0	1	1	0	0	0	1	0	0
990	Elatostema	tenuireceptaculum		P	0	0	1	0	0	0	0	1	0	0
991	Elatostema	tetratepalum		P	0	0	0	0	0	0	1	0	0	1
992	Elatostema	tianense		P	0	0	1	1	0	0	0	1	0	0
993	Elatostema	trichocarpum		P	0	0	1	0	0	0	0	1	0	0
994	Elatostema	villosum		P	0	0	1	0	0	0	0	1	0	0
995	Elatostema	wangii		P	0	0	1	0	0	0	0	1	0	0
996	Elatostema	wenxienense		H	0	0	1	0	0	0	0	1	0	0
997	Elatostema	xanthophyllum		P	0	0	1	0	0	0	0	1	0	0
998	Elatostema	xichouense		P	0	0	1	1	0	0	0	1	0	0
999	Elatostema	yangbiense		P	0	0	0	1	0	0	0	1	0	0
1000	Elatostema	yaoshanense		H	0	0	1	0	0	0	0	1	0	0
1001	Elatostema	youyangense		P	0	0	1	0	0	0	0	1	0	0
1002	Elatostema	yui		P	0	0	1	0	0	0	0	1	0	0
1003	Elatostema	yungshunense		P	0	0	1	0	0	0	0	1	0	0
1004	Girardinia	diversifolia	ssp.triloba	A	0	0	1	0	0	1	0	1	1	0
1005	Laportea	fujianensis		A	0	0	1	0	0	0	0	1	0	0
1006	Laportea	medogensis		P	0	0	0	0	0	0	1	0	0	1
1007	Lecanthus	petelotii	var.yunanensis	A	0	0	1	0	0	0	0	1	0	0
1008	Lecanthus	petelotii	var.corniculata	A	0	0	1	1	0	0	1	1	0	1
1009	Lecanthus	pileoides		A	0	0	1	1	0	0	0	1	0	0
1010	Oreocnide	frutescens	ssp.insignis	S	0	0	1	1	0	0	0	1	0	0
1011	Oreocnide	kwangsiensis		S	0	0	1	1	0	0	0	1	0	0
1012	Pellionia	brachyceras		P	0	0	1	0	0	0	0	1	0	0
1013	Pellionia	caulialata		P	0	0	1	1	0	0	0	1	0	0
1014	Pellionia	grijsii		P	0	0	0	1	0	0	0	1	0	0
1015	Pellionia	incisoserrata		P	0	0	1	1	0	0	0	1	0	0
1016	Pellionia	leiocarpa		P	0	0	1	0	0	0	0	1	0	0
1017	Pellionia	macrophylla		P	0	0	1	1	0	0	1	1	0	1
1018	Pellionia	retrohispida		P	0	0	1	0	0	0	1	1	0	1
1019	Pellionia	viridis	var.basiinaequalis	P	0	0	1	0	0	0	0	1	0	0
1020	Pellionia	viridis		P	0	0	1	1	0	0	0	1	0	0
1021	Pellionia	yunnanensis		P	0	0	0	1	0	0	0	1	0	0
1022	Pilea	amplistipulata		HS	0	0	0	1	0	0	0	1	0	0
1023	Pilea	angulata	ssp.latiuscula	P	0	1	1	0	0	0	0	1	0	0
1024	Pilea	aquarum	ssp.acutidentata	P	0	0	1	1	0	0	0	1	0	0
1025	Pilea	auricularis		H	0	0	1	1	0	0	1	1	0	1
1026	Pilea	bambusifolia		H	0	0	1	0	0	0	0	1	0	0
1027	Pilea	basicordata		S	0	0	1	0	0	0	0	1	0	0
1028	Pilea	cavaleriei	ssp.crenata	H	0	0	1	1	0	0	0	1	0	0
1029	Pilea	cordistipulata		P	0	0	1	1	0	0	0	1	0	0
1030	Pilea	elliptilimba		H	0	0	1	1	0	0	0	1	0	0
1031	Pilea	funkikensis		H	0	0	1	0	0	0	0	1	0	0
1032	Pilea	gansuensis		A	0	1	1	0	0	1	1	1	1	1
1033	Pilea	howelliana	var.denticulata	H	0	0	0	1	0	0	0	1	0	0
1034	Pilea	howelliana		H	0	0	1	1	0	0	0	1	0	0
1035	Pilea	lomatogramma		P	0	0	1	1	0	0	0	1	0	0
1036	Pilea	longicaulis	var.erosa	HS	0	0	1	0	0	0	0	1	0	0
1037	Pilea	macrocarpa		P	0	0	0	0	0	0	1	0	0	1
1038	Pilea	matsudai		P	0	0	1	0	0	0	0	1	0	0
1039	Pilea	media		P	0	0	1	1	0	0	0	1	0	0
1040	Pilea	menghaiensis		P	0	0	0	1	0	0	0	1	0	0
1041	Pilea	microcardia		A	0	0	1	0	0	0	0	1	0	0
1042	Pilea	monilifera		H	0	0	1	1	0	0	0	1	0	0
1043	Pilea	multicellularis		H	0	0	1	0	0	0	0	1	0	0
1044	Pilea	pauciflora		A	0	1	1	0	0	1	1	1	1	1
1045	Pilea	pellionioides		H	0	0	1	0	0	0	0	1	0	0
1046	Pilea	peltata	var.ovatifolia	H	0	0	1	0	0	0	0	1	0	0
1047	Pilea	peltata		H	0	0	1	1	0	0	0	1	0	0
1048	Pilea	peperomioides		P	0	0	1	1	0	0	0	1	0	0
1049	Pilea	pumila	var.obtusifolia	A	0	0	1	0	0	1	1	1	1	1
1050	Pilea	receptacularis		H	0	0	1	0	0	0	1	1	0	1
1051	Pilea	rostellata		H	0	0	1	0	0	0	0	1	0	0
1052	Pilea	rotundinucula		H	0	0	1	0	0	0	0	1	0	0
1053	Pilea	rubriflora		P	0	0	1	0	0	0	1	1	0	1
1054	Pilea	sinocrassifolia		H	0	0	1	1	0	0	0	1	0	0
1055	Pilea	somae		H	0	0	1	0	0	0	0	1	0	0
1056	Pilea	subcoriacea		P	0	0	1	1	0	0	1	1	0	1
1057	Pilea	subedentata		H	0	0	0	1	0	0	0	1	0	0
1058	Pilea	gracilis	var.subtriplinervia	P	0	0	0	1	0	0	0	1	0	0
1059	Pilea	gracilis	var.fujianensis	P	0	0	1	0	0	0	0	1	0	0
1060	Pilea	villicaulis		P	0	0	0	1	0	0	0	1	0	0
1061	Pouzolzia	niveotomentosa		S	0	0	1	1	0	0	0	1	0	0
1062	Pouzolzia	sanguinea	var.elegans	S	0	0	1	1	0	0	1	1	0	1
1063	Pouzolzia	spinosobracteata		S	0	0	1	0	0	0	1	1	0	1
1064	Urtica	atrichocaulis		P	0	0	1	1	0	0	0	1	0	0
1065	Urtica	dioica	ssp.gansuensis	P	0	1	1	0	0	1	1	1	1	1
1066	Urtica	laetevirens	ssp.dentata	P	0	0	1	1	0	1	1	1	1	1
1067	Urtica	taiwaniana		H	0	0	1	0	0	0	0	1	0	0
1068	Urtica	triangularis	ssp.trichocarpa	P	0	1	1	0	0	1	1	1	1	1
1069	Urtica	triangularis	ssp.pinnatifida	P	0	1	1	1	0	1	1	1	1	1
1070	Urtica	triangularis		P	0	1	1	1	0	1	1	1	1	1
1071	Helicia	clivicola		S	0	0	0	1	0	0	0	1	0	0
1072	Helicia	dongxingensis		T	0	0	0	1	0	0	0	1	0	0
1073	Helicia	kwangtungensis		T	0	0	1	1	0	0	0	1	0	0
1074	Helicia	rengetiensis		T	0	0	1	0	0	0	0	1	0	0
1075	Helicia	reticulata		T	0	0	1	0	0	0	0	1	0	0
1076	Helicia	shweliensis		T	0	0	0	1	0	0	0	1	0	0
1077	Helicia	silvicola		T	0	0	0	1	0	0	0	1	0	0
1078	Helicia	tibetensis		T	0	0	1	1	0	0	1	1	0	1
1079	Helicia	tsaii		T	0	0	0	1	0	0	0	1	0	0
1080	Helicia	vestita	var.longipes	T	0	0	0	0	0	0	1	0	0	1
1081	Heliciopsis	henryi		T	0	0	0	1	0	0	0	1	0	0
1082	Heliciopsis	lobata		T	0	0	0	1	0	0	0	1	0	0
1083	Malania	oleifera		T	0	0	0	1	0	0	0	1	0	0
1084	Olax	austrosinensis		S	0	0	0	1	0	0	0	1	0	0
1085	Schoepfia	chinensis		T	0	0	1	1	0	0	0	1	0	0
1086	Schoepfia	jasminodora	var.malipoensis	T	0	0	0	1	0	0	0	1	0	0
1087	Buckleya	graebneriana		S	0	1	1	0	0	1	1	1	1	1
1088	Buckleya	henryi		S	0	1	1	0	0	1	1	1	1	1
1089	Phacellaria	fargesii		P	0	0	1	1	0	0	1	1	0	1
1090	Phacellaria	glomerata		S	0	0	1	0	0	0	0	1	0	0
1091	Thesium	bomiense		H	0	0	0	0	0	0	1	0	0	1
1092	Thesium	brevibracteatum		H	0	0	0	0	1	0	0	0	1	0
1093	Thesium	cathaicum		P	0	1	0	0	0	0	0	1	0	0
1094	Thesium	chinense	var.longipedunculatum	P	1	0	1	1	0	0	1	1	0	1
1095	Thesium	jarmilae		P	0	0	0	0	0	0	1	0	0	1
1096	Thesium	longiflorum		P	0	0	1	1	0	0	1	1	0	1
1097	Thesium	orgadophilum		H	0	0	0	0	0	0	1	0	0	1
1098	Thesium	ramosoides		P	0	0	1	1	0	0	0	1	0	0
1099	Thesium	remotebraceatum		P	0	0	1	1	0	0	0	1	0	0
1100	Thesium	tongolicum		P	0	0	0	0	0	0	1	0	0	1
1101	Arceuthobium	chinense		S	0	0	1	1	0	0	1	1	0	1
1102	Arceuthobium	pini		S	0	0	1	1	0	0	1	1	0	1
1103	Arceuthobium	tibetense		S	0	0	0	0	0	0	1	0	0	1
1104	Helixanthera	guangxiensis		S	0	0	1	1	0	0	0	1	0	0
1105	Helixanthera	scoriarum		S	0	0	1	1	0	0	0	1	0	0
1106	Loranthus	guizhouensis		S	0	0	1	1	0	0	0	1	0	0
1107	Loranthus	kaoi		S	0	0	1	0	0	0	0	1	0	0
1108	Loranthus	pseudo-odoratus		S	0	0	1	0	0	0	1	1	0	1
1109	Scurrula	chingii	var.yunnanensis	S	0	0	1	1	0	0	0	1	0	0
1110	Scurrula	gongshanensis		S	0	0	1	0	0	0	0	1	0	0
1111	Scurrula	phoebe-formosanae		S	0	0	1	0	0	0	0	1	0	0
1112	Taxillus	caloreas	var.fargesii	S	0	0	1	0	0	0	0	1	0	0
1113	Taxillus	delavayi	var.yanijingensis	S	0	0	0	0	0	0	1	0	0	1
1114	Taxillus	delavayi	var.barbatus	S	0	0	0	0	0	0	1	0	0	1
1115	Taxillus	kaempferi	var.grandiflorus	S	0	0	1	0	0	0	1	1	0	1
1116	Taxillus	levinei		S	0	0	1	1	0	0	0	1	0	0
1117	Taxillus	liquidambaricola		S	0	0	0	1	0	0	0	1	0	0
1118	Taxillus	liquidambaricola	var.neriifolius	S	0	0	0	1	0	0	0	1	0	0
1119	Taxillus	nigrans		S	0	0	1	1	0	0	0	1	0	0
1120	Taxillus	pseudochinensis		S	0	0	1	0	0	0	0	1	0	0
1121	Taxillus	renii		S	0	0	1	1	0	0	0	1	0	0
1122	Taxillus	sutchuenensis	var.duclouxii	S	0	0	1	0	0	0	0	1	0	0
1123	Taxillus	sutchuenensis		S	0	1	1	0	0	1	0	1	1	0
1124	Taxillus	theifer		S	0	0	1	0	0	0	0	1	0	0
1125	Taxillus	thibetensis		S	0	0	1	1	0	0	1	1	0	1
1126	Taxillus	tsaii		S	0	0	1	0	0	0	0	1	0	0
1127	Tolypanthus	esquirolii		S	0	0	1	1	0	0	0	1	0	0
1128	Tolypanthus	maclurei		S	0	0	1	0	0	0	0	1	0	0
1129	Viscum	diospyrosicolum		S	0	0	1	0	0	1	1	1	1	1
1130	Viscum	fargesii		S	0	1	1	0	0	1	1	1	1	1
1131	Viscum	nudum		S	0	0	1	1	0	0	0	1	0	0
1132	Viscum	yunnanense		S	0	0	0	1	0	0	0	1	0	0
1133	Aristolochia	austrochinensis		HV	0	0	0	1	0	0	0	1	0	0
1134	Aristolochia	bambusifolia		WV	0	0	1	0	0	0	0	1	0	0
1135	Aristolochia	caulialata		WV	0	0	1	1	0	0	0	1	0	0
1136	Aristolochia	championii		WV	0	0	1	1	0	0	1	1	0	1
1137	Aristolochia	chlamydophylla		HV	0	0	0	1	0	0	0	1	0	0
1138	Aristolochia	cucurbitifolia		HV	0	0	1	0	0	0	0	1	0	0
1139	Aristolochia	delavayi		H	0	0	1	1	0	0	0	1	0	0
1140	Aristolochia	fangchi		WV	0	0	1	1	0	0	0	1	0	0
1141	Aristolochia	fordiana		HV	0	0	1	1	0	0	0	1	0	0
1142	Aristolochia	forrestiana		WV	0	0	1	1	0	0	0	1	0	0
1143	Aristolochia	fujianensis		HV	0	0	1	0	0	0	0	1	0	0
1144	Aristolochia	fulvicoma		WV	0	0	0	1	0	0	0	1	0	0
1145	Aristolochia	gentilis		HV	0	0	1	1	0	0	0	1	0	0
1146	Aristolochia	hainanensis		WV	0	0	0	1	0	0	0	1	0	0
1147	Aristolochia	howii		WV	0	0	0	1	0	0	0	1	0	0
1148	Aristolochia	impresinervis		HV	0	0	1	1	0	0	0	1	0	0
1149	Aristolochia	kunmingensis		WV	0	0	1	1	0	0	0	1	0	0
1150	Aristolochia	kwangsiensis		WV	0	0	1	1	0	0	0	1	0	0
1151	Aristolochia	mollissima		WV	0	1	1	0	0	0	0	1	0	0
1152	Aristolochia	moupinensis		WV	0	0	1	0	0	0	0	1	0	0
1153	Aristolochia	obliqua		HV	0	0	1	1	0	0	0	1	0	0
1154	Aristolochia	ovatifolia		WV	0	0	1	1	0	0	0	1	0	0
1155	Aristolochia	polymorpha		HV	0	0	0	1	0	0	0	1	0	0
1156	Aristolochia	scytophylla		WV	0	0	1	1	0	0	0	1	0	0
1157	Aristolochia	thibetica		S	0	0	1	1	0	0	0	1	0	0
1158	Aristolochia	thwaitesii		S	0	0	1	0	0	0	0	1	0	0
1159	Aristolochia	tuberosa		HV	0	0	1	1	0	0	0	1	0	0
1160	Aristolochia	tubiflora		HV	0	0	1	0	0	0	1	1	0	1
1161	Aristolochia	utriformis		HV	0	0	1	1	0	0	0	1	0	0
1162	Aristolochia	versicolor		WV	0	0	0	1	0	0	0	1	0	0
1163	Aristolochia	westlandii		WV	0	0	1	1	0	0	0	1	0	0
1164	Aristolochia	zhongdianensis		HV	0	0	1	0	0	0	0	1	0	0
1165	Asarum	bashanense		P	0	0	1	0	0	0	1	1	0	1
1166	Asarum	campaniflorum		P	0	0	1	0	0	0	0	1	0	0
1167	Asarum	cardiophyllum		P	0	0	1	1	0	0	0	1	0	0
1168	Asarum	caudigerellum		P	0	0	1	0	0	0	0	1	0	0
1169	Asarum	caulescens		P	0	0	1	0	0	1	1	1	1	1
1170	Asarum	chengkouense		P	0	0	1	0	0	0	0	1	0	0
1171	Asarum	chinense		P	0	0	1	0	0	0	1	1	0	1
1172	Asarum	crassisepalum		P	1	0	0	0	0	0	0	1	0	0
1173	Asarum	crispulatum		P	0	0	1	0	0	0	1	1	0	1
1174	Asarum	debile		P	0	0	1	0	0	0	1	1	0	1
1175	Asarum	delavayi		P	0	0	1	1	0	0	0	1	0	0
1176	Asarum	epigynum		P	0	0	1	1	0	0	0	1	0	0
1177	Asarum	forbesii		P	0	0	1	0	0	0	1	1	0	1
1178	Asarum	fukienense		P	0	1	1	0	0	0	0	1	0	0
1179	Asarum	geophilum		P	0	0	1	1	0	0	0	1	0	0
1180	Asarum	hongkongense		P	0	0	1	0	0	0	0	1	0	0
1181	Asarum	hypogynum		T	0	0	1	0	0	0	0	1	0	0
1182	Asarum	ichangense		P	0	0	1	1	0	0	0	1	0	0
1183	Asarum	inflatum		P	0	0	1	0	0	0	0	1	0	0
1184	Asarum	insigne		P	0	0	1	1	0	0	0	1	0	0
1185	Asarum	longerhizomatosum		P	0	0	1	1	0	0	0	1	0	0
1186	Asarum	macranthum		P	0	0	1	0	0	0	0	1	0	0
1187	Asarum	magnificum	var.dinghuense	P	0	0	1	1	0	0	0	1	0	0
1188	Asarum	magnificum		P	0	0	1	1	0	0	0	1	0	0
1189	Asarum	maximum		P	0	0	1	0	0	0	1	1	0	1
1190	Asarum	nanchuanense		P	0	0	1	0	0	0	1	1	0	1
1191	Asarum	nobilissimum		P	0	0	1	0	0	0	0	1	0	0
1192	Asarum	porphyronotum	var.atrovirens	P	0	0	1	0	0	0	1	1	0	1
1193	Asarum	porphyronotum		P	0	0	1	0	0	0	1	1	0	1
1194	Asarum	pulchellum		P	0	1	1	0	0	0	0	1	0	0
1195	Asarum	renicordatum		H	0	1	1	0	0	0	0	1	0	0
1196	Asarum	sagittarioides		P	0	0	1	1	0	0	0	1	0	0
1197	Asarum	splendens		P	0	0	1	0	0	0	0	1	0	0
1198	Asarum	taipingshanianum		P	0	0	1	0	0	0	0	1	0	0
1199	Asarum	tongjiangense		P	0	0	1	0	0	0	0	1	0	0
1200	Asarum	wulingense		P	0	0	1	0	0	0	0	1	0	0
1201	Asarum	yunnanense		P	0	0	0	1	0	0	0	1	0	0
1202	Saruma	henryi		H	0	0	1	0	0	1	1	1	1	1
1203	Thottea	hainanensis		S	0	0	0	1	0	0	0	1	0	0
1204	Mitrastemon	yamamotoi	var.kanehirae	H	0	0	1	0	0	0	0	1	0	0
1205	Balanophora	subcupularis		H	0	0	1	0	0	0	0	1	0	0
1206	Atraphaxis	frutescens	var.papillosa	S	0	0	0	0	0	1	0	0	1	0
1207	Atraphaxis	irtyschensis		S	0	0	0	0	0	1	0	0	1	0
1208	Atraphaxis	manshurica		S	1	0	1	0	1	1	0	1	1	0
1209	Calligonum	alashanicum		S	1	0	0	0	1	1	0	1	1	0
1210	Calligonum	chinense		S	1	0	0	0	1	1	0	1	1	0
1211	Calligonum	jimunaicum		S	0	0	0	0	0	1	0	0	1	0
1212	Calligonum	klementzii		S	0	0	0	0	0	1	0	0	1	0
1213	Calligonum	korlaense		S	0	0	0	0	0	1	0	0	1	0
1214	Calligonum	trifarium		S	0	0	0	0	0	1	0	0	1	0
1215	Calligonum	yengisaricum		S	0	0	0	0	0	1	0	0	1	0
1216	Calligonum	zaidamense		S	0	0	0	0	0	1	1	0	1	1
1217	Fagopyrum	caudatum		A	0	1	1	1	0	1	0	1	1	0
1218	Fagopyrum	gracilipes		A	0	1	1	0	0	1	0	1	1	0
1219	Fagopyrum	leptopodum	var.grossii	A	0	0	1	1	0	0	0	1	0	0
1220	Fagopyrum	leptopodum		A	0	0	1	1	0	0	0	1	0	0
1221	Fagopyrum	lineare		A	0	0	1	1	0	0	0	1	0	0
1222	Fagopyrum	statice		P	0	0	1	1	0	0	0	1	0	0
1223	Fagopyrum	urophyllum		HS	0	0	1	1	0	0	0	1	0	0
1224	Fallopia	aubertii		HS	1	1	1	0	1	1	1	1	1	1
1225	Fallopia	cynanchoides	var.glabriuscula	P	0	0	1	0	0	0	1	1	0	1
1226	Fallopia	cynanchoides		P	0	0	1	0	0	1	0	1	1	0
1227	Fallopia	denticulata		P	0	0	1	1	0	0	1	1	0	1
1228	Fallopia	dumetorum	var.pauciflora	A	1	1	0	0	0	0	0	1	0	0
1229	Fallopia	dumetorum	var.subalata	A	1	1	0	0	0	0	0	1	0	0
1230	Fallopia	multiflora	var.ciliinerve	P	1	0	1	0	0	1	1	1	1	1
1231	Oxyria	sinensis		P	0	0	1	1	0	0	1	1	0	1
1232	Parapteropyrum	tibeticum		S	0	0	0	0	0	0	1	0	0	1
1233	Polygonum	cathayanum		P	0	0	1	1	0	0	1	1	0	1
1234	Polygonum	chinense	var.paradoxum	P	0	0	1	1	0	0	0	1	0	0
1235	Polygonum	coriaceum		P	0	0	1	1	0	0	1	1	0	1
1236	Polygonum	criopolitanum		A	0	0	1	1	0	0	0	1	0	0
1237	Polygonum	cyanandrum		A	0	0	1	1	0	1	1	1	1	1
1238	Polygonum	darrisii		A	0	0	1	0	0	1	0	1	1	0
1239	Polygonum	emodi	var.dependens	S	0	0	1	1	0	0	1	1	0	1
1240	Polygonum	fertile		A	0	1	0	0	0	1	1	1	1	1
1241	Polygonum	honanense		P	0	1	1	0	0	0	0	1	0	0
1242	Polygonum	huananense		P	0	0	1	1	0	0	0	1	0	0
1243	Polygonum	jucundum		A	0	0	1	0	0	1	0	1	1	0
1244	Polygonum	lichiangense		P	0	0	1	1	0	0	0	1	0	0
1245	Polygonum	limicola		A	0	0	1	1	0	0	0	1	0	0
1246	Polygonum	paleaceum	var.pubifolium	P	0	0	1	1	0	0	0	1	0	0
1247	Polygonum	paralimicola		A	0	0	1	0	0	0	0	1	0	0
1248	Polygonum	persicaria	var.opacum	A	0	0	1	0	0	0	0	1	0	0
1249	Polygonum	pinetorum		P	0	0	1	1	0	1	0	1	1	0
1250	Polygonum	platyphyllum		P	1	1	0	0	1	0	0	1	1	0
1251	Polygonum	popovii		S	0	0	0	0	0	1	0	0	1	0
1252	Polygonum	purpureonervosum		P	0	0	0	0	0	0	1	0	0	1
1253	Polygonum	runcinatum	var.sinense	P	0	0	1	1	0	1	1	1	1	1
1254	Polygonum	sinomontanum		P	0	0	1	1	0	0	1	1	0	1
1255	Polygonum	sparsipilosum	var.hubertii	A	0	1	1	0	0	1	1	1	1	1
1256	Polygonum	sparsipilosum		A	0	1	0	0	0	1	1	1	1	1
1257	Polygonum	strindbergii		P	0	0	1	1	0	0	1	1	0	1
1258	Polygonum	subscaposum		P	0	0	1	1	0	0	0	1	0	0
1259	Polygonum	suffultoides		P	0	0	1	0	0	0	0	1	0	0
1260	Polygonum	suffultum	var.pergracile	P	0	0	1	0	0	1	1	1	1	1
1261	Polygonum	tibeticum		HS	0	0	0	0	0	0	1	0	0	1
1262	Polygonum	umbrosum		P	0	0	1	1	0	0	0	1	0	0
1263	Polygonum	viviparum	var.tenuifolium	P	0	1	1	1	0	1	1	1	1	1
1264	Pteroxygonum	giraldii		P	0	1	1	0	1	1	1	1	1	1
1265	Rheum	alexandrae		H	0	0	1	1	0	0	1	1	0	1
1266	Rheum	forrestii		H	0	0	1	1	0	0	1	1	0	1
1267	Rheum	glabricaule		H	0	1	1	0	0	1	1	1	1	1
1268	Rheum	hotaoense		H	0	1	0	0	0	1	1	1	1	1
1269	Rheum	inopinatum		H	0	0	0	0	0	0	1	0	0	1
1270	Rheum	kialense		H	0	1	1	1	0	1	0	1	1	0
1271	Rheum	laciniatum		H	0	0	1	0	0	0	1	1	0	1
1272	Rheum	lhasaense		H	0	0	0	0	0	0	1	0	0	1
1273	Rheum	likiangense		H	0	0	1	1	0	0	1	1	0	1
1274	Rheum	maculatum		H	0	0	1	0	0	0	1	1	0	1
1275	Rheum	officinale		H	0	0	1	0	0	0	0	1	0	0
1276	Rheum	palmatum		H	1	1	1	1	1	1	1	1	1	1
1277	Rheum	przewalskyi		H	0	1	1	0	0	1	1	1	1	1
1278	Rheum	pumilum		H	0	1	0	0	0	1	1	1	1	1
1279	Rheum	racemiferum		H	1	0	1	0	1	1	1	1	1	1
1280	Rheum	rhomboideum		H	0	0	0	0	0	0	1	0	0	1
1281	Rheum	subacaule		H	0	0	0	0	0	0	1	0	0	1
1282	Rheum	sublanceolatum		H	0	1	1	0	0	1	1	1	1	1
1283	Rheum	tanguticum	var.liupanshanense	H	0	1	1	0	0	1	1	1	1	1
1284	Rheum	tanguticum		H	0	1	1	0	0	1	1	1	1	1
1285	Rumex	nepalensis	var.remotiflorus	P	0	0	1	1	0	0	0	1	0	0
1286	Rumex	yungningensis		P	0	0	1	0	0	0	0	1	0	0
1287	Archiatriplex	nanpinensis		A	0	0	1	0	0	0	0	1	0	0
1288	Baolia	bracteata		A	0	0	0	0	0	0	1	0	0	1
1289	Chenopodium	urbicum	ssp.sinicum	A	1	1	0	0	1	1	0	1	1	0
1290	Corispermum	candelabrum		A	1	0	0	0	1	1	0	1	1	0
1291	Corispermum	chinganicum	var.stellipile	A	1	0	0	0	1	1	0	1	1	0
1292	Corispermum	dilutum		A	0	0	0	0	1	0	0	0	1	0
1293	Corispermum	falcatum		A	0	0	0	0	0	0	1	0	0	1
1294	Corispermum	huanghoense		A	0	1	0	0	0	0	0	1	0	0
1295	Corispermum	lepidocarpum		A	0	0	0	0	0	0	1	0	0	1
1296	Corispermum	lhasaense		A	0	0	0	0	0	0	1	0	0	1
1297	Corispermum	pamiricum	var.pilocarpum	A	0	0	0	0	0	0	1	0	0	1
1298	Corispermum	platypterum		A	1	1	0	0	0	0	0	1	0	0
1299	Corispermum	praecox		A	0	1	0	0	0	0	0	1	0	0
1300	Corispermum	pseudofalcatum		A	0	0	0	0	0	0	1	0	0	1
1301	Corispermum	puberulum		A	0	1	0	0	0	0	0	1	0	0
1302	Corispermum	retortum		A	1	0	0	0	0	0	0	1	0	0
1303	Corispermum	stauntonii		A	1	0	0	0	1	1	0	1	1	0
1304	Corispermum	stenolepis		A	1	1	0	0	1	1	0	1	1	0
1305	Cornulaca	alaschanica		A	0	1	1	0	1	1	1	1	1	1
1306	Kalidium	cuspidatum	var.sinicum	S	0	1	1	0	1	1	1	1	1	1
1307	Kochia	prostrata	var.canescens	HS	1	0	1	0	1	1	1	1	1	1
1308	Kochia	prostrata	var.villosissima	HS	0	0	0	0	0	1	0	0	1	0
1309	Krascheninnikovia	arborescens		S	1	0	1	0	0	1	1	1	1	1
1310	Krascheninnikovia	compacta	var.longipilosa	S	0	0	0	0	0	0	1	0	0	1
1311	Salsola	chinghaiensis		A	0	0	0	0	0	0	1	0	0	1
1312	Salsola	junatovii		HS	0	0	0	0	0	1	0	0	1	0
1313	Salsola	sinkiangensis		A	0	1	1	0	0	1	0	1	1	0
1314	Suaeda	rigida		A	0	0	0	0	0	1	0	0	1	0
1315	Suaeda	stellatiflora		A	0	1	1	0	0	1	0	1	1	0
1316	Amaranthus	taishanensis		A	0	1	1	0	0	0	0	1	0	0
1317	Celosia	taitoensis		H	0	0	1	0	0	0	0	1	0	0
1318	Psilotrichopsis	curtisii	var.hainanensis	P	0	0	0	1	0	0	0	1	0	0
1319	Psilotrichum	ferrugineum	var.ximengense	A	0	0	0	1	0	0	0	1	0	0
1320	Psilotrichum	yunnanedse		A	0	0	1	1	0	0	0	1	0	0
1321	Commicarpus	lantsangensis		HS	0	0	1	1	0	0	1	1	0	1
1322	Oxybaphus	himalaicus	var.chinensis	A	0	1	1	1	0	1	1	1	1	1
1323	Phytolacca	polyandra		H	0	1	1	1	0	1	0	1	1	0
1324	Portulaca	insularis		H	0	0	1	0	0	0	0	1	0	0
1325	Portulaca	psammotropha		P	0	0	0	1	0	0	0	1	0	0
1326	Arenaria	acicularis		P	0	0	0	0	0	0	1	0	0	1
1327	Arenaria	aksayqingensis		P	0	0	0	0	0	1	0	0	1	0
1328	Arenaria	amdoensis		H	0	0	0	0	0	0	1	0	0	1
1329	Arenaria	auricoma		P	0	0	1	0	0	0	0	1	0	0
1330	Arenaria	barbata	var.hirsutissima	P	0	0	1	0	0	0	0	1	0	0
1331	Arenaria	barbata		P	0	0	1	1	0	0	0	1	0	0
1332	Arenaria	baxoiensis		P	0	0	1	0	0	0	1	1	0	1
1333	Arenaria	bomiensis		H	0	0	0	0	0	0	1	0	0	1
1334	Arenaria	brevipetala		P	0	0	0	0	0	0	1	0	0	1
1335	Arenaria	chamdoensis		P	0	0	0	0	0	0	1	0	0	1
1336	Arenaria	dawuensis		P	0	0	1	0	0	0	1	1	0	1
1337	Arenaria	delavayi		P	0	0	1	1	0	0	1	1	0	1
1338	Arenaria	dimorphitricha		A	0	0	1	1	0	0	0	1	0	0
1339	Arenaria	dsharaensis		P	0	0	0	0	0	0	1	0	0	1
1340	Arenaria	euodonta		P	0	0	1	0	0	0	0	1	0	0
1341	Arenaria	festucoides	var.imbricata	P	0	0	0	0	0	0	1	0	0	1
1342	Arenaria	filipes		H	0	0	0	0	0	0	1	0	0	1
1343	Arenaria	fimbriata		H	0	1	1	0	0	1	1	1	1	1
1344	Arenaria	fridericae		P	0	0	1	1	0	0	1	1	0	1
1345	Arenaria	gerzensis		P	0	0	0	0	0	0	1	0	0	1
1346	Arenaria	giraldii		H	0	1	1	0	0	1	1	1	1	1
1347	Arenaria	grueningiana		P	1	1	0	0	1	1	0	1	1	0
1348	Arenaria	haitzeshanensis		P	0	0	1	0	0	0	1	1	0	1
1349	Arenaria	inconspicua		P	0	0	1	0	0	0	0	1	0	0
1350	Arenaria	inornata		P	0	0	1	0	0	0	0	1	0	0
1351	Arenaria	iochanensis		H	0	0	1	0	0	0	0	1	0	0
1352	Arenaria	ionandra	var.melanotricha	H	0	0	1	0	0	0	0	1	0	0
1353	Arenaria	ionandra		H	0	0	1	1	0	0	0	1	0	0
1354	Arenaria	ischnophylla		P	0	0	0	0	0	0	1	0	0	1
1355	Arenaria	kansuensis		P	0	1	1	1	0	1	1	1	1	1
1356	Arenaria	karakorensis		A	0	0	0	0	0	0	1	0	0	1
1357	Arenaria	lancangensis		P	0	0	1	1	0	0	1	1	0	1
1358	Arenaria	leucasteria		P	0	0	0	0	0	0	1	0	0	1
1359	Arenaria	littledalei		H	0	0	0	0	0	0	1	0	0	1
1360	Arenaria	longicaulis		A	0	0	1	0	0	0	0	1	0	0
1361	Arenaria	longipes		A	0	0	1	0	0	0	0	1	0	0
1362	Arenaria	longipetiolata		H	0	0	1	0	0	0	0	1	0	0
1363	Arenaria	longiseta		H	0	0	1	0	0	0	0	1	0	0
1364	Arenaria	longistyla	var.pleurogynoides	H	0	0	1	1	0	0	1	1	0	1
1365	Arenaria	longistyla	var.eugonophylla	H	0	0	1	1	0	0	0	1	0	0
1366	Arenaria	longistyla		H	0	0	1	1	0	0	1	1	0	1
1367	Arenaria	melandryiformis		P	0	0	0	0	0	0	1	0	0	1
1368	Arenaria	membranisepala		H	0	0	1	0	0	0	0	1	0	0
1369	Arenaria	minima		H	0	0	1	0	0	0	0	1	0	0
1370	Arenaria	monantha		P	0	0	0	0	0	0	1	0	0	1
1371	Arenaria	monilifera		P	0	0	1	0	0	0	1	1	0	1
1372	Arenaria	monosperma		P	0	0	0	0	0	0	1	0	0	1
1373	Arenaria	napuligera	var.monocephala	A	0	0	1	1	0	0	1	1	0	1
1374	Arenaria	napuligera		A	0	0	1	1	0	0	1	1	0	1
1375	Arenaria	nigricans	var.zhenkangensis	H	0	0	0	1	0	0	0	1	0	0
1376	Arenaria	nigricans		H	0	0	1	1	0	0	0	1	0	0
1377	Arenaria	nivalomontana		H	0	0	1	0	0	0	0	1	0	0
1378	Arenaria	omeiensis		H	0	0	1	0	0	0	0	1	0	0
1379	Arenaria	pharensis		A	0	0	0	0	0	0	1	0	0	1
1380	Arenaria	pogonantha		P	0	0	1	1	0	0	1	1	0	1
1381	Arenaria	polysperma		P	0	0	1	0	0	0	0	1	0	0
1382	Arenaria	polytrichoides		P	0	0	0	0	0	0	1	0	0	1
1383	Arenaria	przewalskii		P	0	1	1	0	0	1	1	1	1	1
1384	Arenaria	pseudostellaria		A	0	0	1	1	0	0	0	1	0	0
1385	Arenaria	puranensis		P	0	0	0	0	0	0	1	0	0	1
1386	Arenaria	qinghaiensis		P	0	0	0	0	0	0	1	0	0	1
1387	Arenaria	quadridentata		H	0	1	1	0	0	1	1	1	1	1
1388	Arenaria	ramellata		P	0	0	0	0	0	0	1	0	0	1
1389	Arenaria	reducta		H	0	0	1	1	0	0	0	1	0	0
1390	Arenaria	roborowskii		P	0	0	0	0	0	0	1	0	0	1
1391	Arenaria	rockii		P	0	0	1	0	0	0	0	1	0	0
1392	Arenaria	roseiflora		P	0	0	1	0	0	0	0	1	0	0
1393	Arenaria	saginoides		A	0	0	0	0	0	1	1	0	1	1
1394	Arenaria	salweenensis		P	0	0	1	0	0	0	0	1	0	0
1395	Arenaria	schneideriana		H	0	0	1	0	0	0	0	1	0	0
1396	Arenaria	setifera		H	0	0	0	1	0	0	0	1	0	0
1397	Arenaria	shannanensis		P	0	0	0	0	0	0	1	0	0	1
1398	Arenaria	shennongjiaensis		P	0	0	1	0	0	0	0	1	0	0
1399	Arenaria	smithiana		P	0	0	1	1	0	0	1	1	0	1
1400	Arenaria	spathulifolia		H	0	0	1	1	0	0	0	1	0	0
1401	Arenaria	szechuensis		P	0	0	1	0	0	0	1	1	0	1
1402	Arenaria	taibaishanensis		P	0	0	1	0	0	0	0	1	0	0
1403	Arenaria	trichophora		P	0	0	1	1	0	0	1	1	0	1
1404	Arenaria	trichophylla		P	0	0	1	0	0	0	0	1	0	0
1405	Arenaria	tumengelaensis		P	0	0	0	0	0	0	1	0	0	1
1406	Arenaria	weissiana	var.puberula	P	0	0	1	0	0	0	1	1	0	1
1407	Arenaria	weissiana	var.bifida	P	0	0	1	0	0	0	0	1	0	0
1408	Arenaria	weissiana		P	0	0	1	1	0	0	0	1	0	0
1409	Arenaria	xerophila	var.xiangchengensis	P	0	0	0	0	0	0	1	0	0	1
1410	Arenaria	xerophila		P	0	0	1	1	0	0	0	1	0	0
1411	Arenaria	yulongshanensis		P	0	0	1	0	0	0	0	1	0	0
1412	Arenaria	yunnanensis	var.caespitosa	H	0	0	1	0	0	0	0	1	0	0
1413	Arenaria	yunnanensis		H	0	0	1	1	0	0	0	1	0	0
1414	Arenaria	zadoiensis		P	0	0	0	0	0	0	1	0	0	1
1415	Arenaria	zhongdianensis		H	0	0	1	0	0	0	0	1	0	0
1416	Cerastium	baischanense		P	1	0	0	0	0	0	0	1	0	0
1417	Cerastium	glomeratum	var.brachycarpus	A	1	1	0	0	0	0	0	1	0	0
1418	Cerastium	limprichtii		P	0	1	1	0	0	0	0	1	0	0
1419	Cerastium	morrisonense		B	0	0	1	0	0	0	0	1	0	0
1420	Cerastium	Parvipetalum		A	0	0	1	0	0	0	0	1	0	0
1421	Cerastium	subpilosum		P	0	0	1	0	0	0	0	1	0	0
1422	Cerastium	szechuense		A	0	0	0	0	0	0	1	0	0	1
1423	Cerastium	takasagomontanum		A	0	0	1	0	0	0	0	1	0	0
1424	Cerastium	verticifolium		P	0	0	0	0	0	1	0	0	1	0
1425	Cerastium	wilsonii		P	0	0	1	1	0	1	0	1	1	0
1426	Dianthus	palinensis		P	0	0	1	0	0	0	0	1	0	0
1427	Dianthus	pygmaeus		P	0	0	1	0	0	0	0	1	0	0
1428	Gypsophila	huashanensis		P	0	1	1	0	0	0	0	1	0	0
1429	Gypsophila	spinosa		P	0	0	0	0	0	1	0	0	1	0
1430	Gypsophila	tschiliensis		P	0	1	0	0	0	0	0	1	0	0
1431	Psammosilene	tunicoides		P	0	0	1	1	0	0	1	1	0	1
1432	Pseudocerastium	stellarioides		P	0	1	1	0	0	0	0	1	0	0
1433	Pseudostellaria	helanshanensis		P	0	0	0	0	1	0	0	0	1	0
1434	Pseudostellaria	tibetica		P	0	0	1	0	0	0	1	1	0	1
1435	Pseudostellaria	zhejiangensis		P	0	0	1	0	0	0	0	1	0	0
1436	Silene	adenocalyx		P	0	0	0	0	0	0	1	0	0	1
1437	Silene	alaschanica		P	0	0	0	0	1	0	0	0	1	0
1438	Silene	asclepiadea		P	0	0	1	1	0	0	0	1	0	0
1439	Silene	atrocastanea		P	0	0	1	0	0	0	0	1	0	0
1440	Silene	atsaensis		H	0	0	0	0	0	0	1	0	0	1
1441	Silene	batangensis		P	0	0	1	0	0	0	1	1	0	1
1442	Silene	bilingua		P	0	0	1	1	0	0	1	1	0	1
1443	Silene	cardiopetala		P	0	0	1	1	0	0	1	1	0	1
1444	Silene	chodatii	var.pygmaea	P	0	0	1	1	0	0	0	1	0	0
1445	Silene	chodatii		P	0	0	1	1	0	0	0	1	0	0
1446	Silene	chungtienensis		H	0	0	1	0	0	0	0	1	0	0
1447	Silene	davidii		H	0	0	1	1	0	0	1	1	0	1
1448	Silene	dawoensis		H	0	0	1	1	0	0	0	1	0	0
1449	Silene	delavayi		H	0	0	1	0	0	0	0	1	0	0
1450	Silene	dumetosa		H	0	0	1	0	0	0	0	1	0	0
1451	Silene	esquamata		H	0	0	1	1	0	0	0	1	0	0
1452	Silene	fortunei		P	0	1	1	0	1	1	1	1	1	1
1453	Silene	gracilenta		P	0	0	1	0	0	0	0	1	0	0
1454	Silene	gracilicaulis		P	0	0	1	1	1	0	1	1	1	1
1455	Silene	grandiflora		P	0	0	1	1	0	0	0	1	0	0
1456	Silene	herbilegorum		P	0	0	1	1	0	0	0	1	0	0
1457	Silene	huguettiae	var.pilosa	P	0	0	1	1	0	0	1	1	0	1
1458	Silene	huguettiae		P	0	1	1	1	0	1	1	1	1	1
1459	Silene	hupehensis	var.pubescens	P	0	1	1	0	0	0	0	1	0	0
1460	Silene	hupehensis		P	0	0	1	0	0	1	1	1	1	1
1461	Silene	incisa		P	0	0	1	0	0	0	1	1	0	1
1462	Silene	kialensis		P	0	1	0	0	0	1	1	1	1	1
1463	Silene	kungessana		P	0	0	0	0	0	1	0	0	1	0
1464	Silene	lamarum		P	0	0	1	1	0	0	0	1	0	0
1465	Silene	lhassana		P	0	0	0	0	0	0	1	0	0	1
1466	Silene	lichiangensis		P	0	0	1	0	0	0	0	1	0	0
1467	Silene	lineariloba		P	0	0	1	0	0	0	0	1	0	0
1468	Silene	longicornuta		P	0	0	1	1	0	0	0	1	0	0
1469	Silene	melanantha		P	0	0	1	0	0	0	0	1	0	0
1470	Silene	monbeigii		P	0	0	1	1	0	0	1	1	0	1
1471	Silene	morrisonmontana	var.glabella	P	0	0	1	0	0	0	0	1	0	0
1472	Silene	morrisonmontana		P	0	0	1	0	0	0	0	1	0	0
1473	Silene	muliensis		P	0	0	1	0	0	0	0	1	0	0
1474	Silene	multifurcata		P	0	0	0	0	0	0	1	0	0	1
1475	Silene	namlaensis		P	0	0	0	0	0	0	1	0	0	1
1476	Silene	nangqenensis		P	0	0	0	0	0	0	1	0	0	1
1477	Silene	napuligera		P	0	0	1	1	0	0	1	1	0	1
1478	Silene	nigrescens	ssp.latifolia	P	0	0	1	1	0	0	0	1	0	0
1479	Silene	ningxiaensis		P	1	0	1	0	1	1	1	1	1	1
1480	Silene	oblanceolata		P	0	0	1	1	0	0	0	1	0	0
1481	Silene	otodonta		P	0	0	1	1	0	0	0	1	0	0
1482	Silene	phoenicodonta		P	0	0	1	1	0	0	0	1	0	0
1483	Silene	platyphylla		P	0	0	1	1	0	0	0	1	0	0
1484	Silene	principis		P	0	0	0	0	0	0	1	0	0	1
1485	Silene	pseudofortunei		P	0	1	1	0	0	0	1	1	0	1
1486	Silene	pubicalycina		P	0	0	1	1	0	0	1	1	0	1
1487	Silene	puranensis		P	0	0	0	0	0	0	1	0	0	1
1488	Silene	qiyunshanensis		P	0	0	1	0	0	0	0	1	0	0
1489	Silene	rosiflora		P	0	0	1	1	0	0	0	1	0	0
1490	Silene	rubricalyx		P	0	0	1	0	0	0	1	1	0	1
1491	Silene	salicifolia		P	0	0	1	0	0	0	1	1	0	1
1492	Silene	scopulorum		P	0	0	1	0	0	0	0	1	0	0
1493	Silene	seoulensis	var.angustata	P	0	1	0	0	0	0	0	1	0	0
1494	Silene	stewartiana		P	0	0	1	0	0	0	0	1	0	0
1495	Silene	subcretacea		H	0	0	0	0	0	1	0	0	1	0
1496	Silene	sveae		P	0	0	1	0	0	0	0	1	0	0
1497	Silene	tatarinowii		P	1	1	1	0	1	1	1	1	1	1
1498	Silene	tibetica		P	0	0	0	0	0	0	1	0	0	1
1499	Silene	trachyphylla		P	0	0	1	1	0	0	1	1	0	1
1500	Silene	tubiformis		P	0	0	1	0	0	0	1	1	0	1
1501	Silene	tubulosa		P	0	0	0	0	0	0	1	0	0	1
1502	Silene	viscidula		P	0	0	1	1	0	0	1	1	0	1
1503	Silene	wardii		H	0	0	0	0	0	0	1	0	0	1
1504	Silene	yetii		P	0	1	0	0	0	1	1	1	1	1
1505	Silene	yunnanensis		P	0	0	1	0	0	0	0	1	0	0
1506	Silene	zhongbaensis		P	0	0	0	0	0	0	1	0	0	1
1507	Silene	zhoui		P	0	0	0	0	0	0	1	0	0	1
1508	Stellaria	alaschanica		P	0	1	1	0	1	1	1	1	1	1
1509	Stellaria	arenarioides		P	0	1	1	0	0	1	1	1	1	1
1510	Stellaria	arisanensis		P	0	0	1	0	0	0	0	1	0	0
1511	Stellaria	bistyla		P	0	0	0	0	1	0	0	0	1	0
1512	Stellaria	cherleriae		P	1	1	0	0	1	1	0	1	1	0
1513	Stellaria	chinensis	var.ciliata	P	0	1	1	0	0	0	0	1	0	0
1514	Stellaria	chinensis		P	0	0	1	1	1	1	1	1	1	1
1515	Stellaria	decumbens	var.arenarioides	P	0	0	1	1	0	0	1	1	0	1
1516	Stellaria	delavayi		P	0	0	1	1	0	0	0	1	0	0
1517	Stellaria	depressa		P	0	0	0	0	0	1	1	0	1	1
1518	Stellaria	dianthifolia		P	0	1	0	0	0	1	1	1	1	1
1519	Stellaria	dichotoma	var.linearis	P	0	1	1	0	1	0	0	1	1	0
1520	Stellaria	graminea	var.viridescens	P	0	1	0	0	0	1	1	1	1	1
1521	Stellaria	graminea	var.pilosula	P	0	0	0	0	0	0	1	0	0	1
1522	Stellaria	graminea	var.chinensis	P	0	0	0	0	0	0	1	0	0	1
1523	Stellaria	gyirongensis		H	0	0	0	0	0	0	1	0	0	1
1524	Stellaria	henryi		A	0	0	1	0	0	0	1	1	0	1
1525	Stellaria	infracta		P	1	1	0	0	1	1	1	1	1	1
1526	Stellaria	lanipes		H	0	0	1	1	0	0	0	1	0	0
1527	Stellaria	mainlingensis		H	0	0	0	0	0	0	1	0	0	1
1528	Stellaria	media	var.micrantha	P	0	0	1	0	0	0	0	1	0	0
1529	Stellaria	omeiensis		A	0	0	1	0	0	0	0	1	0	0
1530	Stellaria	oxycoccoides		A	0	0	1	0	0	0	1	1	0	1
1531	Stellaria	parviumbellata		P	0	1	1	0	0	1	1	1	1	1
1532	Stellaria	petiolaris		P	0	0	1	1	0	0	1	1	0	1
1533	Stellaria	pilosoides		A	0	0	1	1	0	0	0	1	0	0
1534	Stellaria	pusilla		P	0	0	1	1	0	0	1	1	0	1
1535	Stellaria	salicifolia		P	0	1	1	0	0	1	1	1	1	1
1536	Stellaria	souliei		P	0	0	1	0	0	0	1	1	0	1
1537	Stellaria	strongylosepala		P	0	0	0	0	1	0	0	0	1	0
1538	Stellaria	tibetica		A	0	0	0	0	0	0	1	0	0	1
1539	Stellaria	uda		P	0	0	1	1	0	1	1	1	1	1
1540	Stellaria	vestita	var.amplexicaulis	P	0	0	1	1	0	0	0	1	0	0
1541	Stellaria	wushanensis		A	0	0	1	0	0	0	0	1	0	0
1542	Stellaria	yunnanensis		P	0	0	1	1	0	0	0	1	0	0
1543	Stellaria	zangnanensis		H	0	0	1	1	0	0	1	1	0	1
1544	Nuphar	pumila	ssp.sinensis	P	0	1	1	0	0	0	0	1	0	0
1545	Aconitum	abietetorum		P	0	0	1	0	0	0	0	1	0	0
1546	Aconitum	acutiusculum	var.aureopilosum	P	0	0	1	0	0	0	0	1	0	0
1547	Aconitum	acutiusculum		P	0	0	1	0	0	0	0	1	0	0
1548	Aconitum	alboflavidum		P	0	0	1	0	0	0	0	1	0	0
1549	Aconitum	alboviolaceum	var.erectum	P	0	1	0	0	0	0	0	1	0	0
1550	Aconitum	alpinonepalense		P	0	0	0	0	0	0	1	0	0	1
1551	Aconitum	austroyunnanense		P	0	0	0	1	0	0	0	1	0	0
1552	Aconitum	bailangense		P	0	0	0	0	1	0	0	0	1	0
1553	Aconitum	brachypodum	var.crispulum	P	0	0	0	0	0	0	1	0	0	1
1554	Aconitum	brachypodum	var.laxiflorum	P	0	0	1	1	0	0	0	1	0	0
1555	Aconitum	brachypodum		P	0	0	1	1	0	0	0	1	0	0
1556	Aconitum	bracteolatum		P	0	0	0	0	0	0	1	0	0	1
1557	Aconitum	bracteolosum		P	0	0	1	0	0	0	0	1	0	0
1558	Aconitum	brevicalcaratum	var.parviflorum	P	0	0	1	1	0	0	0	1	0	0
1559	Aconitum	brevicalcaratum		P	0	0	1	1	0	0	0	1	0	0
1560	Aconitum	brevilimbum		P	0	0	0	0	0	0	1	0	0	1
1561	Aconitum	brevipetalum		P	0	0	1	0	0	0	0	1	0	0
1562	Aconitum	brunneum		P	0	1	1	0	0	1	1	1	1	1
1563	Aconitum	bulbilliferum		P	0	0	1	0	0	0	0	1	0	0
1564	Aconitum	bulleyanum		P	0	0	1	0	0	0	0	1	0	0
1565	Aconitum	campylorrhynchum	var.tenuipes	P	0	0	0	0	0	0	1	0	0	1
1566	Aconitum	campylorrhynchum	var.patentipilum	P	0	0	0	0	0	0	1	0	0	1
1567	Aconitum	campylorrhynchum		P	0	1	1	0	0	1	1	1	1	1
1568	Aconitum	cannabifolium		P	0	0	1	0	0	0	1	1	0	1
1569	Aconitum	carmichaeli	var.hwangshanicum	P	0	1	1	0	0	0	0	1	0	0
1570	Aconitum	carmichaeli	var.pubescens	P	0	1	1	0	0	1	1	1	1	1
1571	Aconitum	carmichaeli	var.tripartitum	P	0	1	1	0	0	0	0	1	0	0
1572	Aconitum	carmichaeli	var.truppelianum	P	1	1	1	0	1	0	0	1	1	0
1573	Aconitum	changianum		P	0	0	1	1	0	0	1	1	0	1
1574	Aconitum	chayuense		P	0	0	0	0	0	0	1	0	0	1
1575	Aconitum	chiachaense	var.glandulosum	P	0	0	0	0	0	0	1	0	0	1
1576	Aconitum	chiachaense		P	0	0	0	0	0	0	1	0	0	1
1577	Aconitum	chienningense	var.lasiocarpum	P	0	0	0	0	0	0	1	0	0	1
1578	Aconitum	chienningense		P	0	0	1	0	0	0	1	1	0	1
1579	Aconitum	chilienshanicum		P	0	1	1	0	0	1	1	1	1	1
1580	Aconitum	chrysotrichum		P	0	0	0	0	0	0	1	0	0	1
1581	Aconitum	chuanum		P	0	0	1	0	0	0	0	1	0	0
1582	Aconitum	chuosjiaense		P	0	0	0	0	0	0	1	0	0	1
1583	Aconitum	contortum		P	0	0	1	0	0	0	0	1	0	0
1584	Aconitum	coriaceifolium		P	0	0	1	0	0	0	0	1	0	0
1585	Aconitum	crassiflorum		P	0	0	1	1	0	0	0	1	0	0
1586	Aconitum	creagromorphum		P	0	0	0	0	0	0	1	0	0	1
1587	Aconitum	daxinganlinense		P	0	0	0	0	1	0	0	0	1	0
1588	Aconitum	delavayi		P	0	0	1	0	0	0	0	1	0	0
1589	Aconitum	diqingense		P	0	0	1	0	0	0	0	1	0	0
1590	Aconitum	dolichorhynchum		P	0	0	1	0	0	0	0	1	0	0
1591	Aconitum	dolichostachyum		P	0	0	0	0	0	0	1	0	0	1
1592	Aconitum	duclouxii	var.ecalcaratum	P	0	0	1	0	0	0	0	1	0	0
1593	Aconitum	duclouxii		P	0	0	1	0	0	0	0	1	0	0
1594	Aconitum	dunhuaense		P	1	0	0	0	0	0	0	1	0	0
1595	Aconitum	elliotii	var.pilopetalum	P	0	0	0	0	0	0	1	0	0	1
1596	Aconitum	elliotii	var.glabrescens	P	0	0	0	0	0	0	1	0	0	1
1597	Aconitum	elliotii	var.doshongense	P	0	0	0	0	0	0	1	0	0	1
1598	Aconitum	elliotii		P	0	0	0	0	0	0	1	0	0	1
1599	Aconitum	episcopale		P	0	0	1	1	0	0	0	1	0	0
1600	Aconitum	falciforme		P	0	0	1	1	0	0	0	1	0	0
1601	Aconitum	fangianum		P	0	0	1	0	0	0	0	1	0	0
1602	Aconitum	fanjingshanicum		P	0	0	1	0	0	0	0	1	0	0
1603	Aconitum	finetianum		P	0	1	1	0	0	0	0	1	0	0
1604	Aconitum	flavum		P	1	0	0	0	1	1	1	1	1	1
1605	Aconitum	formosanum		P	0	0	1	0	0	0	0	1	0	0
1606	Aconitum	forrestii	var.albovillosum	P	0	0	1	0	0	0	0	1	0	0
1607	Aconitum	forrestii		P	0	0	1	1	0	0	0	1	0	0
1608	Aconitum	franchetii	var.lasiocalyx	P	0	0	1	0	0	0	0	1	0	0
1609	Aconitum	franchetii	var.subnaviculare	P	0	0	1	0	0	0	0	1	0	0
1610	Aconitum	franchetii	var.villosulum	P	0	0	0	0	0	0	1	0	0	1
1611	Aconitum	franchetii	var.geniculatum	P	0	0	1	0	0	0	0	1	0	0
1612	Aconitum	franchetii	var.glabrescens	P	0	0	1	0	0	0	0	1	0	0
1613	Aconitum	franchetii		P	0	0	1	0	0	0	1	1	0	1
1614	Aconitum	fukutomei		P	0	0	1	0	0	0	0	1	0	0
1615	Aconitum	fusungense		P	1	0	0	0	0	0	0	1	0	0
1616	Aconitum	geniculatum	var.humilius	P	0	0	1	0	0	0	0	1	0	0
1617	Aconitum	geniculatum	var.longicalcaratum	P	0	0	1	0	0	0	0	1	0	0
1618	Aconitum	geniculatum	var.unguiculatum	P	0	0	1	0	0	0	0	1	0	0
1619	Aconitum	geniculatum		P	0	0	1	1	0	0	0	1	0	0
1620	Aconitum	georgei		P	0	0	1	0	0	0	0	1	0	0
1621	Aconitum	gezaense		P	0	0	1	0	0	0	0	1	0	0
1622	Aconitum	glabrisepalum		P	0	0	0	0	0	0	1	0	0	1
1623	Aconitum	gymnandrum		A	0	1	1	1	0	1	1	1	1	1
1624	Aconitum	habaense		P	0	0	1	0	0	0	0	1	0	0
1625	Aconitum	hamatipetalum		P	0	0	1	0	0	0	0	1	0	0
1626	Aconitum	handelianum	var.laxipilosum	P	0	0	1	0	0	0	1	1	0	1
1627	Aconitum	handelianum		P	0	0	1	1	0	0	0	1	0	0
1628	Aconitum	hemsleyanum	var.atropurpureum	P	0	0	1	0	0	0	0	1	0	0
1629	Aconitum	hemsleyanum	var.chingtungense	P	0	0	1	0	0	0	0	1	0	0
1630	Aconitum	hemsleyanum	var.elongatum	P	0	0	0	0	0	0	1	0	0	1
1631	Aconitum	hemsleyanum	var.hsiae	P	0	0	0	0	0	0	1	0	0	1
1632	Aconitum	hemsleyanum	var.unguiculatum	P	0	0	1	0	0	0	0	1	0	0
1633	Aconitum	hemsleyanum	var.pilopetalum	P	0	0	1	0	0	0	0	1	0	0
1634	Aconitum	hemsleyanum	var.lasianthum	P	0	0	1	0	0	0	0	1	0	0
1635	Aconitum	hemsleyanum	var.puberulum	P	0	0	0	0	0	0	1	0	0	1
1636	Aconitum	hemsleyanum	var.xizangense	P	0	0	0	0	0	0	1	0	0	1
1637	Aconitum	henryi	var.pilocarpum	P	0	0	1	0	0	0	0	1	0	0
1638	Aconitum	henryi	var.compositum	P	0	1	1	0	0	1	1	1	1	1
1639	Aconitum	henryi	var.villosum	P	0	1	1	0	0	0	1	1	0	1
1640	Aconitum	henryi		P	0	1	1	0	0	0	1	1	0	1
1641	Aconitum	huiliense		P	0	0	1	0	0	0	0	1	0	0
1642	Aconitum	ichangense		P	0	0	1	0	0	0	0	1	0	0
1643	Aconitum	incisofidum		P	0	0	1	1	0	0	0	1	0	0
1644	Aconitum	iochanicum		P	0	0	1	0	0	0	0	1	0	0
1645	Aconitum	jaluense	var.truncatum	P	1	0	0	0	0	0	0	1	0	0
1646	Aconitum	jaluense	var.glabrescens	P	0	1	0	0	0	0	0	1	0	0
1647	Aconitum	jilongense		P	0	0	0	0	0	0	1	0	0	1
1648	Aconitum	jinyangense		P	0	0	1	0	0	0	0	1	0	0
1649	Aconitum	jiulongense		P	0	0	1	0	0	0	0	1	0	0
1650	Aconitum	kagerpuense		P	0	0	1	0	0	0	0	1	0	0
1651	Aconitum	karakolicum	var.patentipilum	P	0	0	0	0	0	1	0	0	1	0
1652	Aconitum	kirinense	var.australe	P	0	1	1	0	0	0	0	1	0	0
1653	Aconitum	kirinense	var.heterophyllum	P	0	1	0	0	0	0	0	1	0	0
1654	Aconitum	kojimae	var.ramosum	P	0	0	1	0	0	0	0	1	0	0
1655	Aconitum	kojimae		P	0	0	1	0	0	0	0	1	0	0
1656	Aconitum	kongboense	var.villosum	P	0	0	1	0	0	0	1	1	0	1
1657	Aconitum	kongboense	var.polycarpum	P	0	0	1	0	0	0	0	1	0	0
1658	Aconitum	kongboense		P	0	0	1	1	0	0	1	1	0	1
1659	Aconitum	kungshanense		P	0	0	1	1	0	0	0	1	0	0
1660	Aconitum	kusnezoffii	var.gibbiferum	P	1	1	0	0	0	0	0	1	0	0
1661	Aconitum	fengii		P	0	0	1	1	0	0	0	1	0	0
1662	Aconitum	legendrei		P	0	0	1	0	0	0	0	1	0	0
1663	Aconitum	leiostachyum		P	0	0	0	0	0	0	1	0	0	1
1664	Aconitum	leiwuqiense		P	0	0	0	0	0	0	1	0	0	1
1665	Aconitum	leucostomum	var.hopeiense	P	0	1	0	0	0	0	0	1	0	0
1666	Aconitum	liangshanicum		P	0	0	1	0	0	0	0	1	0	0
1667	Aconitum	lihsienense		P	0	0	0	0	0	0	1	0	0	1
1668	Aconitum	liljestrandii	var.falcatum	P	0	0	0	0	0	0	1	0	0	1
1669	Aconitum	liljestrandii		P	0	0	1	0	0	0	1	1	0	1
1670	Aconitum	lioui		P	0	0	1	0	0	0	0	1	0	0
1671	Aconitum	lobulatum		P	0	0	1	0	0	0	0	1	0	0
1672	Aconitum	lonchodontum		P	0	0	1	0	0	0	0	1	0	0
1673	Aconitum	longilobum		P	0	0	0	0	0	0	1	0	0	1
1674	Aconitum	longipedicellatum		P	0	0	0	0	0	0	1	0	0	1
1675	Aconitum	longipetiolatum		P	0	0	0	0	0	0	1	0	0	1
1676	Aconitum	longiramosum		P	0	0	0	0	0	0	1	0	0	1
1677	Aconitum	ludlowii		P	0	0	0	0	0	0	1	0	0	1
1678	Aconitum	luningense		P	0	0	1	0	0	0	0	1	0	0
1679	Aconitum	lycoctonifolium		P	0	0	0	0	0	0	1	0	0	1
1680	Aconitum	magnibracteolatum		P	0	0	1	0	0	0	0	1	0	0
1681	Aconitum	maowenense		P	0	0	1	0	0	0	0	1	0	0
1682	Aconitum	milinense		P	0	0	0	0	0	0	1	0	0	1
1683	Aconitum	nagarum	var.heterotrichum	P	0	0	1	1	0	0	0	1	0	0
1684	Aconitum	nagarum	var.lasiandrum	P	0	0	1	0	0	0	0	1	0	0
1685	Aconitum	namlaense		P	0	0	0	0	0	0	1	0	0	1
1686	Aconitum	nielamuense		P	0	0	0	0	0	0	1	0	0	1
1687	Aconitum	ningwuense		P	0	1	0	0	0	0	0	1	0	0
1688	Aconitum	nutantiflorum		P	0	0	0	0	0	0	1	0	0	1
1689	Aconitum	ouvrardianum	var.acutiusculum	P	0	0	1	1	0	0	0	1	0	0
1690	Aconitum	ouvrardianum	var.pilopes	P	0	0	1	0	0	0	0	1	0	0
1691	Aconitum	ouvrardianum		P	0	0	1	1	0	0	1	1	0	1
1692	Aconitum	paniculigerum	var.wulingense	P	0	1	0	0	0	0	0	1	0	0
1693	Aconitum	parcifolium		P	0	0	1	0	0	0	0	1	0	0
1694	Aconitum	pendulicarpum	var.circinatum	P	0	0	1	0	0	0	0	1	0	0
1695	Aconitum	pendulicarpum		P	0	0	1	1	0	0	1	1	0	1
1696	Aconitum	pendulum		P	0	1	0	1	0	1	1	1	1	1
1697	Aconitum	phyllostegium	var.pilosum	P	0	0	1	0	0	0	0	1	0	0
1698	Aconitum	phyllostegium		P	0	0	1	1	0	0	0	1	0	0
1699	Aconitum	piepunense	var.pilosum	P	0	0	1	0	0	0	0	1	0	0
1700	Aconitum	piepunense		P	0	0	1	0	0	0	0	1	0	0
1701	Aconitum	pilopetalum		P	0	0	0	0	0	0	1	0	0	1
1702	Aconitum	polyanthum	var.puberulum	P	0	0	0	0	0	0	1	0	0	1
1703	Aconitum	polyanthum		P	0	0	1	0	0	0	1	1	0	1
1704	Aconitum	polycarpum		P	0	0	1	0	0	0	0	1	0	0
1705	Aconitum	polyschistum		P	0	0	0	0	0	0	1	0	0	1
1706	Aconitum	pomeense		P	0	0	0	0	0	0	1	0	0	1
1707	Aconitum	potaninii		P	0	0	0	0	0	0	1	0	0	1
1708	Aconitum	prominens		P	0	0	0	0	0	0	1	0	0	1
1709	Aconitum	pseudobrunneum		P	0	0	0	0	0	0	1	0	0	1
1710	Aconitum	pseudodivaricatum		P	0	0	0	0	0	0	1	0	0	1
1711	Aconitum	pseudogeniculatum	var.pubipes	P	0	0	1	0	0	0	0	1	0	0
1712	Aconitum	pseudogeniculatum		P	0	0	1	0	0	0	1	1	0	1
1713	Aconitum	pseudohuiliense		P	0	0	1	0	0	0	0	1	0	0
1714	Aconitum	pseudostapfianum		P	0	0	1	0	0	0	0	1	0	0
1715	Aconitum	pukeense	var.brevipes	P	0	0	1	0	0	0	0	1	0	0
1716	Aconitum	pukeense		P	0	0	1	1	0	0	0	1	0	0
1717	Aconitum	pulchellum	var.hispidum	P	0	0	1	1	0	0	1	1	0	1
1718	Aconitum	pulchellum	var.racemosum	P	0	0	1	0	0	0	0	1	0	0
1719	Aconitum	pycnanthum		P	0	0	1	0	0	0	0	1	0	0
1720	Aconitum	qinghaiense		P	0	1	1	0	0	1	1	1	1	1
1721	Aconitum	racemulosum	var.grandibracteolatum	P	0	0	1	0	0	0	0	1	0	0
1722	Aconitum	racemulosum		P	0	0	1	0	0	0	0	1	0	0
1723	Aconitum	ramulosum		P	0	0	1	1	0	0	0	1	0	0
1724	Aconitum	refracticarpum		P	0	0	1	1	0	0	0	1	0	0
1725	Aconitum	refractum		P	0	0	1	0	0	0	1	1	0	1
1726	Aconitum	rhombifolium	var.leiocarpum	P	0	0	1	0	0	0	0	1	0	0
1727	Aconitum	rhombifolium		P	0	0	1	0	0	0	0	1	0	0
1728	Aconitum	richardsonianum	var.pseudosessiliflorum	P	0	0	0	0	0	0	1	0	0	1
1729	Aconitum	richardsonianum		P	0	0	0	0	0	0	1	0	0	1
1730	Aconitum	rilongense		P	0	0	0	0	0	0	1	0	0	1
1731	Aconitum	rockii		P	0	0	1	0	0	0	0	1	0	0
1732	Aconitum	scaposum	var.vaginatum	P	0	0	1	0	0	1	0	1	1	0
1733	Aconitum	secundiflorum		P	0	0	1	0	0	0	0	1	0	0
1734	Aconitum	sessiliflorum		P	0	0	1	1	0	0	0	1	0	0
1735	Aconitum	shensiense		P	0	0	1	0	0	0	0	1	0	0
1736	Aconitum	shimianense		P	0	0	1	0	0	0	0	1	0	0
1737	Aconitum	sinchiangense		P	0	0	0	0	0	1	0	0	1	0
1738	Aconitum	sinoaxillare		P	0	0	0	0	0	0	1	0	0	1
1739	Aconitum	sinomontanum	var.pilocarpum	P	0	0	0	0	0	0	1	0	0	1
1740	Aconitum	sinomontanum	var.angustius	P	0	1	1	1	0	0	0	1	0	0
1741	Aconitum	sinomontanum		P	0	1	1	1	1	1	1	1	1	1
1742	Aconitum	sinonapelloides	var.weisiense	P	0	0	1	0	0	0	0	1	0	0
1743	Aconitum	sinonapelloides	var.subulatum	P	0	0	1	0	0	0	0	1	0	0
1744	Aconitum	smithii		P	0	1	0	0	0	0	0	1	0	0
1745	Aconitum	souliei		P	0	0	1	0	0	0	0	1	0	0
1746	Aconitum	spathulatum		P	0	0	1	0	0	0	0	1	0	0
1747	Aconitum	spiripetalum		P	0	0	0	0	0	0	1	0	0	1
1748	Aconitum	stapfianum	var.pubipes	P	0	0	1	0	0	0	0	1	0	0
1749	Aconitum	stapfianum		P	0	0	1	0	0	0	0	1	0	0
1750	Aconitum	straminiflorum		P	0	0	1	0	0	0	0	1	0	0
1751	Aconitum	stylosoides		P	0	0	0	0	0	0	1	0	0	1
1752	Aconitum	stylosum	var.geniculatum	P	0	0	1	1	0	0	1	1	0	1
1753	Aconitum	stylosum		P	0	0	1	1	0	0	1	1	0	1
1754	Aconitum	sungpanense	var.villosulum	P	0	0	1	0	0	0	0	1	0	0
1755	Aconitum	sungpanense	var.leucanthum	P	0	0	1	0	0	0	0	1	0	0
1756	Aconitum	sungpanense		P	0	1	1	0	0	1	1	1	1	1
1757	Aconitum	taipeicum		P	0	1	1	0	0	0	0	1	0	0
1758	Aconitum	talassicum	var.villosulum	P	0	0	0	0	0	1	0	0	1	0
1759	Aconitum	tangense		P	0	0	0	0	0	0	1	0	0	1
1760	Aconitum	tanguticum	var.trichocarpum	P	0	1	1	1	0	1	1	1	1	1
1761	Aconitum	tanguticum		P	0	1	1	1	0	1	1	1	1	1
1762	Aconitum	taronense		P	0	0	1	0	0	0	0	1	0	0
1763	Aconitum	tatsienense	var.divaricatum	P	0	0	0	0	0	0	1	0	0	1
1764	Aconitum	tatsienense		P	0	0	0	0	0	0	1	0	0	1
1765	Aconitum	tenuicaule		P	0	0	1	0	0	0	0	1	0	0
1766	Aconitum	tongolense	var.patentipilum	P	0	0	1	0	0	0	0	1	0	0
1767	Aconitum	tongolense		P	0	0	1	1	0	0	1	1	0	1
1768	Aconitum	transsectum		P	0	0	1	1	0	0	0	1	0	0
1769	Aconitum	tsaii	var.puberulum	P	0	0	1	0	0	0	0	1	0	0
1770	Aconitum	tsaii		P	0	0	1	0	0	0	0	1	0	0
1771	Aconitum	tschangbaischanense		P	1	0	0	0	0	0	0	1	0	0
1772	Aconitum	validinerve		P	0	0	1	0	0	0	0	1	0	0
1773	Aconitum	vilmorinianum	var.patentipilum	P	0	0	1	1	0	0	0	1	0	0
1774	Aconitum	vilmorinianum		P	0	0	1	1	0	0	0	1	0	0
1775	Aconitum	weixiense		P	0	0	1	0	0	0	0	1	0	0
1776	Aconitum	wuchagouense		P	0	0	0	0	1	0	0	0	1	0
1777	Aconitum	xiangchengense		P	0	0	0	0	0	0	1	0	0	1
1778	Aconitum	yachiangense		P	0	0	0	0	0	0	1	0	0	1
1779	Aconitum	yangii	var.villosulum	P	0	0	1	0	0	0	0	1	0	0
1780	Aconitum	yangii		P	0	0	1	0	0	0	0	1	0	0
1781	Aconitum	yanyuanense		P	0	0	1	0	0	0	0	1	0	0
1782	Aconitum	yinschanicum		P	0	0	0	0	1	0	0	0	1	0
1783	Aconitum	yunlingense		P	0	0	1	0	0	0	0	1	0	0
1784	Aconitum	zhaojiuense		P	0	0	1	0	0	0	0	1	0	0
1785	Adonis	bobroviana		P	1	0	1	0	1	1	1	1	1	1
1786	Adonis	coerulea		P	0	1	0	0	0	1	1	1	1	1
1787	Adonis	sutchuenensis		P	0	1	1	0	0	0	1	1	0	1
1788	Anemoclema	glauciifolium		P	0	0	1	1	0	0	0	1	0	0
1789	Anemone	baicalensis	var.kansuensis	P	0	0	1	0	0	0	0	1	0	0
1790	Anemone	baicalensis	var.saniculiformis	P	0	0	1	0	0	0	0	1	0	0
1791	Anemone	begoniifolia		P	0	0	1	1	0	0	0	1	0	0
1792	Anemone	brevistyla		P	0	0	1	0	0	0	0	1	0	0
1793	Anemone	davidii		P	0	0	1	0	0	0	1	1	0	1
1794	Anemone	delavayi	var.oligocarpa	P	0	0	1	0	0	0	0	1	0	0
1795	Anemone	delavayi		P	0	0	1	1	0	0	0	1	0	0
1796	Anemone	demissa	var.yunnanensis	P	0	0	1	1	0	0	0	1	0	0
1797	Anemone	erythrophylla		P	0	0	1	0	0	0	0	1	0	0
1798	Anemone	exigua	var.shanxiensis	P	0	1	0	0	0	0	0	1	0	0
1799	Anemone	exigua		P	0	1	1	1	0	1	1	1	1	1
1800	Anemone	filisecta		P	0	0	0	1	0	0	0	1	0	0
1801	Anemone	flaccida	var.hirtella	P	0	0	1	0	0	0	0	1	0	0
1802	Anemone	flaccida	var.anhuiensis	P	0	0	1	0	0	0	0	1	0	0
1803	Anemone	flaccida	var.hofengensis	P	0	0	1	0	0	0	1	1	0	1
1804	Anemone	hokouensis		P	0	0	0	1	0	0	0	1	0	0
1805	Anemone	hupehensis		P	0	0	1	1	0	0	0	1	0	0
1806	Anemone	imbricata		P	0	1	0	0	0	1	1	1	1	1
1807	Anemone	laceratoincisa		P	0	0	1	0	0	0	0	1	0	0
1808	Anemone	obtusiloba	ssp.leiophylla	P	0	0	1	0	0	0	0	1	0	0
1809	Anemone	obtusiloba	ssp.megaphylla	P	0	0	0	1	0	0	0	1	0	0
1810	Anemone	orthocarpa		P	0	0	1	0	0	0	0	1	0	0
1811	Anemone	patula	var.minor	P	0	0	1	0	0	0	1	1	0	1
1812	Anemone	patula		P	0	0	1	0	0	0	1	1	0	1
1813	Anemone	prattii		P	0	0	1	1	0	0	0	1	0	0
1814	Anemone	raddeana	var.lacerata	P	0	0	1	0	0	0	0	1	0	0
1815	Anemone	rivularis	var.daliensis	P	0	0	1	1	0	0	0	1	0	0
1816	Anemone	rivularis	var.flore-minore	P	1	1	0	0	1	1	1	1	1	1
1817	Anemone	robusta		P	0	0	1	0	0	0	0	1	0	0
1818	Anemone	rockii	var.pilocarpa	P	0	0	1	0	0	0	0	1	0	0
1819	Anemone	rockii	var.multicaulis	P	0	0	1	0	0	0	0	1	0	0
1820	Anemone	scabriuscula		P	0	0	1	0	0	0	0	1	0	0
1821	Anemone	subindivisa		P	0	0	1	1	0	0	0	1	0	0
1822	Anemone	subpinnata		P	0	0	1	0	0	0	0	1	0	0
1823	Anemone	taipaiensis		P	0	0	1	0	0	0	0	1	0	0
1824	Anemone	tibetica		P	0	0	0	0	0	0	1	0	0	1
1825	Anemone	tomentosa		P	0	1	1	0	0	0	1	1	0	1
1826	Anemone	trullifolia	var.lutienensis	P	0	0	1	0	0	0	0	1	0	0
1827	Anemone	trullifolia	var.liangshanica	P	0	0	1	0	0	0	0	1	0	0
1828	Anemone	yulongshanica	var.truncata	P	0	0	1	1	0	0	0	1	0	0
1829	Anemone	yulongshanica		P	0	0	1	1	0	0	0	1	0	0
1830	Aquilegia	ecalcarata		P	0	0	1	0	0	1	1	1	1	1
1831	Aquilegia	incurvata		P	0	1	1	0	0	1	1	1	1	1
1832	Aquilegia	oxysepala	var.kansuensis	P	0	1	1	1	0	1	1	1	1	1
1833	Aquilegia	rockii		P	0	0	1	1	0	0	1	1	0	1
1834	Aquilegia	yabeana		P	1	1	1	0	1	1	0	1	1	0
1835	Asteropyrum	cavaleriei		P	0	0	1	1	0	0	0	1	0	0
1836	Batrachium	bungei	var.micranthum	P	0	0	1	1	0	0	0	1	0	0
1837	Batrachium	pekinense		P	0	1	0	0	0	0	0	1	0	0
1838	Batrachium	trichophyllum	var.jingpoensis	P	1	0	0	0	0	0	0	1	0	0
1839	Batrachium	trichophyllum	var.hirtellum	P	0	0	0	0	0	0	1	0	0	1
1840	Calathodes	oxycarpa		P	0	0	1	1	0	0	0	1	0	0
1841	Calathodes	polycarpa		P	0	0	1	0	0	0	0	1	0	0
1842	Calathodes	unciformis		P	0	0	1	1	0	0	0	1	0	0
1843	Callianthemum	farreri		P	0	1	1	0	0	1	1	1	1	1
1844	Callianthemum	taipaicum		P	0	0	1	0	0	0	0	1	0	0
1845	Caltha	palustris	var.umbrosa	P	0	0	1	1	0	0	0	1	0	0
1846	Caltha	sinogracilis		P	0	0	1	1	0	0	1	1	0	1
1847	Cimicifuga	brachycarpa		P	0	1	1	1	0	0	0	1	0	0
1848	Cimicifuga	foetida	var.foliolosa	P	0	0	1	0	0	0	1	1	0	1
1849	Cimicifuga	foetida	var.velutina	P	0	0	1	1	0	0	0	1	0	0
1850	Cimicifuga	foetida	var.bifida	P	0	0	0	0	0	0	1	0	0	1
1851	Cimicifuga	foetida	var.longibracteata	P	0	0	1	0	0	0	0	1	0	0
1852	Cimicifuga	nanchuenensis		P	0	0	1	0	0	0	0	1	0	0
1853	Cimicifuga	yunnanensis		P	0	0	1	0	0	0	0	1	0	0
1854	Clematis	acerifolia	var.elobata	WV	0	0	0	1	0	0	0	1	0	0
1855	Clematis	acerifolia		S	0	1	0	0	0	0	0	1	0	0
1856	Clematis	acuminata	var.longicaudata	WV	0	0	1	0	0	0	0	1	0	0
1857	Clematis	akebioides		WV	1	1	1	1	1	1	1	1	1	1
1858	Clematis	akoensis		WV	0	0	1	0	0	0	0	1	0	0
1859	Clematis	apiifolia	var.argentilucida	WV	0	0	1	0	0	1	0	1	1	0
1860	Clematis	armandii	var.hefengensis	WV	0	0	1	0	0	0	0	1	0	0
1861	Clematis	armandii	var.farquhariana	WV	0	0	1	0	0	0	1	1	0	1
1862	Clematis	baominiana		WV	0	0	1	0	0	0	0	1	0	0
1863	Clematis	brevicaudata	var.malacotricha	WV	0	0	0	0	0	0	1	0	0	1
1864	Clematis	brevipes		WV	0	0	0	0	0	0	1	0	0	1
1865	Clematis	caudigera		WV	0	0	0	0	0	1	0	0	1	0
1866	Clematis	chekiangensis		WV	0	0	1	0	0	0	0	1	0	0
1867	Clematis	chinensis	var.anhweiensis	WV	0	1	1	0	0	0	0	1	0	0
1868	Clematis	chinensis	var.vestita	WV	0	0	1	0	0	0	0	1	0	0
1869	Clematis	chingii		WV	0	0	1	1	0	0	0	1	0	0
1870	Clematis	chiupehensis		WV	0	0	1	0	0	0	0	1	0	0
1871	Clematis	chrysocoma		WV	0	0	1	1	0	0	0	1	0	0
1872	Clematis	clarkeana		WV	0	0	1	0	0	0	0	1	0	0
1873	Clematis	connata	var.trullifera	WV	0	0	1	1	0	0	0	1	0	0
1874	Clematis	corniculata		WV	0	0	0	0	0	1	0	0	1	0
1875	Clematis	courtoisii		HV	0	0	1	0	0	0	0	1	0	0
1876	Clematis	crassipes	var.pubipes	WV	0	0	0	1	0	0	0	1	0	0
1877	Clematis	crassipes		WV	0	0	0	1	0	0	0	1	0	0
1878	Clematis	dasyandra		WV	0	1	1	0	0	1	1	1	1	1
1879	Clematis	delavayi	var.limprichtii	S	0	0	1	1	0	0	0	1	0	0
1880	Clematis	delavayi	var.spinescens	S	0	0	1	1	0	0	1	1	0	1
1881	Clematis	delavayi	var.calvescens	S	0	0	1	1	0	0	0	1	0	0
1882	Clematis	delavayi		S	0	0	1	1	0	0	1	1	0	1
1883	Clematis	dilatata		WV	0	0	1	0	0	0	0	1	0	0
1884	Clematis	fasciculiflora	var.angustifolia	WV	0	0	1	0	0	0	0	1	0	0
1885	Clematis	fengii		WV	0	0	0	1	0	0	0	1	0	0
1886	Clematis	finetiana	var.pedata	WV	0	0	1	0	0	0	0	1	0	0
1887	Clematis	finetiana		WV	0	0	1	0	0	0	0	1	0	0
1888	Clematis	florida	var.plena	HV	0	0	1	1	0	0	0	1	0	0
1889	Clematis	florida		HV	0	0	1	1	0	0	0	1	0	0
1890	Clematis	formosana		HV	0	0	1	0	0	0	0	1	0	0
1891	Clematis	fruticosa	var.lobata	S	1	1	0	0	1	1	1	1	1	1
1892	Clematis	glabrifolia		WV	0	0	1	0	0	0	0	1	0	0
1893	Clematis	gracilifolia	var.dissectifolia	WV	0	0	1	0	0	0	1	1	0	1
1894	Clematis	gracilifolia	var.lasiocarpa	WV	0	0	0	0	0	0	1	0	0	1
1895	Clematis	gracilifolia	var.macrantha	WV	0	0	1	0	0	0	0	1	0	0
1896	Clematis	gracilifolia		WV	0	1	1	1	0	1	1	1	1	1
1897	Clematis	grandidentata	var.likiangensis	WV	0	1	1	0	0	0	0	1	0	0
1898	Clematis	gratopsis		WV	0	0	1	0	0	1	1	1	1	1
1899	Clematis	hainanensis		WV	0	0	0	1	0	0	0	1	0	0
1900	Clematis	hancockiana		HV	0	0	1	0	0	0	0	1	0	0
1901	Clematis	hastata		WV	0	0	1	0	0	0	0	1	0	0
1902	Clematis	henryi	var.mollis	WV	0	0	1	0	0	0	0	1	0	0
1903	Clematis	henryi	var.ternata	WV	0	0	1	0	0	0	0	1	0	0
1904	Clematis	henryi		WV	0	0	1	0	0	0	0	1	0	0
1905	Clematis	hexapetala	var.tchefouensis	P	0	1	0	0	0	0	0	1	0	0
1906	Clematis	huchouensis		HV	0	0	1	0	0	0	0	1	0	0
1907	Clematis	hupehensis		HV	0	0	1	0	0	0	0	1	0	0
1908	Clematis	iliensis		WV	0	0	0	0	0	1	0	0	1	0
1909	Clematis	intricata	var.purpurea	WV	0	0	0	0	1	0	0	0	1	0
1910	Clematis	jialasaensis	var.macrantha	WV	0	0	1	0	0	0	0	1	0	0
1911	Clematis	jialasaensis		WV	0	0	1	1	0	0	1	1	0	1
1912	Clematis	jingdungensis		WV	0	0	1	1	0	0	0	1	0	0
1913	Clematis	jinzhaiensis		WV	0	0	1	0	0	0	0	1	0	0
1914	Clematis	kirilowii	var.chanetii	WV	0	1	0	0	0	0	0	1	0	0
1915	Clematis	kirilowii		WV	0	1	0	0	0	0	0	1	0	0
1916	Clematis	kockiana		WV	0	0	1	1	0	0	1	1	0	1
1917	Clematis	kweichowensis		WV	0	0	1	0	0	0	0	1	0	0
1918	Clematis	lancifolia	var.ternata	S	0	0	1	0	0	0	0	1	0	0
1919	Clematis	lancifolia		S	0	0	1	1	0	0	0	1	0	0
1920	Clematis	lanuginosa		WV	0	0	1	0	0	0	0	1	0	0
1921	Clematis	laxitrigosa		WV	0	0	1	0	0	0	0	1	0	0
1922	Clematis	liboensis		WV	0	0	1	0	0	0	0	1	0	0
1923	Clematis	lingyunensis		WV	0	0	1	0	0	0	0	1	0	0
1924	Clematis	longistyla		HV	0	0	1	0	0	0	0	1	0	0
1925	Clematis	macropetala	var.albiflora	WV	0	1	0	0	1	0	0	1	1	0
1926	Clematis	mashanensis		WV	0	0	1	0	0	0	0	1	0	0
1927	Clematis	metouensis		WV	0	0	0	0	0	0	1	0	0	1
1928	Clematis	meyeniana	var.uniflora	WV	0	0	1	0	0	0	0	1	0	0
1929	Clematis	moisseenkoi		WV	0	0	0	0	0	1	0	0	1	0
1930	Clematis	montana	var.sterilis	WV	0	0	1	1	0	0	1	1	0	1
1931	Clematis	montana	var.wilsonii	WV	0	0	0	0	0	0	1	0	0	1
1932	Clematis	montana	var.glabrescens	WV	0	0	1	1	0	0	1	1	0	1
1933	Clematis	morii		WV	0	0	1	0	0	0	0	1	0	0
1934	Clematis	nannophylla	var.foliosa	S	0	0	1	0	0	0	0	1	0	0
1935	Clematis	nannophylla	var.pinnatisecta	S	0	0	1	0	0	0	0	1	0	0
1936	Clematis	nannophylla		S	1	1	1	0	1	1	1	1	1	1
1937	Clematis	napoensis		WV	0	0	0	1	0	0	0	1	0	0
1938	Clematis	ningjingshanica		WV	0	0	0	0	0	0	1	0	0	1
1939	Clematis	nukiangensis		WV	0	0	1	0	0	0	0	1	0	0
1940	Clematis	obscura		WV	0	1	1	0	0	1	1	1	1	1
1941	Clematis	orientalis	var.sinorobusta	HV	0	0	0	0	0	1	0	0	1	0
1942	Clematis	otophora		HV	0	1	1	0	0	1	1	1	1	1
1943	Clematis	parviloba	var.rhombicoelliptica	WV	0	0	0	1	0	0	0	1	0	0
1944	Clematis	parviloba	var.bartlettii	WV	0	0	1	0	0	0	0	1	0	0
1945	Clematis	parviloba	var.suboblonga	WV	0	0	1	0	0	0	0	1	0	0
1946	Clematis	parviloba	var.longianthera	WV	0	0	1	0	0	0	0	1	0	0
1947	Clematis	parviloba		WV	0	0	1	0	0	0	0	1	0	0
1948	Clematis	pashanensis	var.latisepala	WV	0	1	1	0	0	0	0	1	0	0
1949	Clematis	pashanensis		WV	0	1	1	0	0	0	1	1	0	1
1950	Clematis	patens	var.tientaiensis	HV	0	0	1	0	0	0	0	1	0	0
1951	Clematis	peterae	var.lishanensis	WV	0	0	1	0	0	0	0	1	0	0
1952	Clematis	peterae	var.trichocarpa	WV	0	0	1	0	0	1	1	1	1	1
1953	Clematis	peterae		WV	0	0	1	1	1	1	1	1	1	1
1954	Clematis	pianmaensis		WV	0	0	1	0	0	0	0	1	0	0
1955	Clematis	pinchuanensis	var.tomentosa	S	0	0	1	0	0	0	0	1	0	0
1956	Clematis	pinchuanensis		S	0	0	1	0	0	0	0	1	0	0
1957	Clematis	pinnata	var.ternatifolia	WV	0	1	0	0	0	0	0	1	0	0
1958	Clematis	pinnata		WV	0	1	0	0	0	0	0	1	0	0
1959	Clematis	pogonandra	var.pilosa	HV	0	0	0	0	0	0	1	0	0	1
1960	Clematis	pogonandra	var.alata	HV	0	0	1	0	0	0	0	1	0	0
1961	Clematis	pogonandra		HV	0	0	1	0	0	1	1	1	1	1
1962	Clematis	potaninii		WV	0	1	1	1	0	1	1	1	1	1
1963	Clematis	pseudootophpra		HV	0	0	1	1	0	0	0	1	0	0
1964	Clematis	pseudopogonandra		WV	0	0	1	1	0	0	1	1	0	1
1965	Clematis	psilandra		S	0	0	1	0	0	0	0	1	0	0
1966	Clematis	pterantha		V	0	0	0	1	0	0	0	1	0	0
1967	Clematis	puberula	var.tenuisepala	WV	0	1	1	1	0	1	0	1	1	0
1968	Clematis	puberula	var.ganpiniana	WV	0	0	1	0	0	0	1	1	0	1
1969	Clematis	puberula	var.subsericea	WV	0	0	0	0	0	0	1	0	0	1
1970	Clematis	pycnocoma		V	0	0	1	0	0	0	0	1	0	0
1971	Clematis	qingchengshanica		WV	0	0	1	0	0	0	0	1	0	0
1972	Clematis	quinquefoliolata		WV	0	0	1	0	0	0	0	1	0	0
1973	Clematis	ranunculoides	var.cordata	HV	0	0	1	0	0	0	0	1	0	0
1974	Clematis	ranunculoides		HV	0	0	1	1	0	0	0	1	0	0
1975	Clematis	repens		HV	0	0	1	1	0	0	0	1	0	0
1976	Clematis	rubifolia		WV	0	0	1	1	0	0	1	1	0	1
1977	Clematis	shenlungchiaensis		WV	0	0	1	0	0	0	0	1	0	0
1978	Clematis	shensiensis		WV	0	0	1	1	0	0	0	1	0	0
1979	Clematis	siamensis	var.monantha	WV	0	0	1	0	0	0	0	1	0	0
1980	Clematis	sinii		WV	0	0	1	0	0	0	0	1	0	0
1981	Clematis	tamurae		HV	0	0	1	0	0	0	0	1	0	0
1982	Clematis	tangutica	var.pubescens	WV	0	1	0	0	0	1	1	1	1	1
1983	Clematis	tangutica	var.obtusiuscula	WV	0	1	0	0	0	1	1	1	1	1
1984	Clematis	tatarinowii		S	0	1	0	0	0	0	0	1	0	0
1985	Clematis	tenuipes		WV	0	0	0	1	0	0	0	1	0	0
1986	Clematis	teretipes		WV	0	0	1	0	0	0	0	1	0	0
1987	Clematis	terniflora	var.garanbiensis	WV	0	0	1	0	0	0	0	1	0	0
1988	Clematis	tibetata	var.lineariloba	WV	0	0	1	0	0	0	1	1	0	1
1989	Clematis	tinghuensis		WV	0	0	1	0	0	0	0	1	0	0
1990	Clematis	tomentella		S	1	1	1	0	1	1	1	1	1	1
1991	Clematis	tongluensis	var.mollisepala	WV	0	0	0	0	0	0	1	0	0	1
1992	Clematis	tsaii		WV	0	0	1	1	0	0	1	1	0	1
1993	Clematis	tsugetorum		S	0	0	1	0	0	0	0	1	0	0
1994	Clematis	uncinata	var.coriacea	WV	0	0	1	0	0	1	1	1	1	1
1995	Clematis	urophylla		WV	0	0	1	1	0	0	1	1	0	1
1996	Clematis	vaniotii		WV	0	0	1	1	0	0	0	1	0	0
1997	Clematis	venusta		WV	0	0	1	0	0	0	0	1	0	0
1998	Clematis	viridis		S	0	0	1	0	0	0	1	1	0	1
1999	Clematis	wenshanensis		WV	0	0	0	1	0	0	0	1	0	0
[truncated: 16,158 more rows]
